# Supplementary material
Source: MDPI journal article supplement (https://www.mdpi.com/2073-4395/11/7/1295)

## Supplementary Materials

**Table S1.** Year wise soil information of the experimental site.

| Level (cm)                    | Nmin (kg/ha). 2015 | Nmin (kg/ha). 2016 | Nmin (kg/ha). 2017 |
|-------------------------------|--------------------|--------------------|--------------------|
| 0-30                          | 13.6               | 22.2               | 27.1               |
| 30-60                         | 24.3               | 10.8               | 36.1               |
| 60-90                         | 27.0               | 10.1               | 25.1               |
| Total                         | <b>64.9</b>        | <b>43.1</b>        | <b>88.3</b>        |
| <b>Soil (mg)/100 g</b>        |                    |                    |                    |
| P <sub>2</sub> O <sub>5</sub> | 15                 | 20                 | 13                 |
| K <sub>2</sub> O              | 21                 | 17                 | 19                 |
| MgO                           | 8                  | 9                  | 9                  |
| PH                            | 6.6                | 6.8                | 7.0                |
| Org. subs (%)                 | 1.8                | 1.6                | 2.4                |

**Table S2.** Fertilizer application, amount and the developmental stage of crop.

| Date of Application | Treatments   | N- Fertilizer <sup>a</sup> | BBCH <sup>b</sup> | Amount of Fertilizer(kg/ha) |
|---------------------|--------------|----------------------------|-------------------|-----------------------------|
| 12/3/2015           | HN-NF, HN-WF | KAS                        | 22                | 50                          |
| 15/4/2015           | HN-NF, HN-WF | KAS                        | 30                | 45                          |
| 27/5/2015           | HN-NF, HN-WF | KAS                        | 49-65             | 60                          |
| 17/3/2016           | HN-NF, HN-WF | KAS                        | 25                | 50                          |
| 6/4/2016            | HN-NF, HN-WF | KAS                        | 30                | 55                          |
| 27/5/2016           | HN-NF, HN-WF | KAS                        | 51-59             | 60                          |
| 24/3/2017           | HN-NF, HN-WF | KAS                        | 25                | 50                          |
| 19/4/2017           | HN-NF, HN-WF | KAS                        | 31-32             | 25                          |
| 29/5/2017           | HN-NF, HN-WF | KAS                        | 49-69             | 60                          |

<sup>a</sup> The treatment LN-NF did not receive further nitrogen fertilization; KAS means Kalkammonsalpeter (Calcium ammonium nitrate). It contains 27 kg N/100 kg (dt) KAS fertilizer, including 13.5 kg/dt for each of NH<sub>4</sub> and NO<sub>3</sub>, and 55 kg CaO (calcium oxide) per 100 kg N and 4 kg MgO (magnesium oxide) per 100 kg N.

<sup>b</sup> BBCH means Biologische Bundesanstalt, Bundessortenamt und CHEmische Industrie.

**Table S3.** Application of herbicide, fungicide, and growth regulators on different developmental stages of the wheat.

| Year | Treatment                             | Plant protection/Growth regulator |              |                                  |                                                                                                                                              |
|------|---------------------------------------|-----------------------------------|--------------|----------------------------------|----------------------------------------------------------------------------------------------------------------------------------------------|
|      |                                       | Application round                 | Date (d.m.Y) | Amount                           | Spraying agents (ative ingredients <sup>a</sup> )                                                                                            |
| 2015 | low nitrogen, no fungicide (LN-NF)    | 1st herbicide                     | 17.03.2015   | 150 gr/ha + 0..7 l/ha + 1.5 l/ha | Broadway 68.3 g/kg Pyroxulam + 22.8 g/kg Florasulam + 68.3 g/kg Cloquintocet-Mexyl (Safener) + FHS (mesosulfuron) + Arelon Top (isoproturon) |
|      |                                       | 2nd herbicide                     | 11.05.2015   | 1.5 l/ha                         | MCPA (2-methyl-4-chlorophenoxyacetic acid)                                                                                                   |
|      |                                       | 1st insecticide                   | 12.06.2015   | 75 ml/ha                         | Karate Zeon (250 g/L Lambda-Cyhalothrin; Oxiran)                                                                                             |
|      | high nitrogen, no fungicide (HN-NF)   | 1st herbicide                     | 17.03.2015   | 150 gr/ha + 0.7 l/ha + 1.5 l/ha  | Broadway + FHS + Arelon Top                                                                                                                  |
|      |                                       | 2nd herbicide                     | 11.05.2015   | 1.5 l/ha                         | MCPA                                                                                                                                         |
|      |                                       | 1st insecticide                   | 12.06.2015   | 75 ml/ha                         | Karate Zeon                                                                                                                                  |
|      |                                       | 1st growth regulator              | 07.04.2015   | 1.0 l/ha                         | CCC (Chlormequat-chloride)                                                                                                                   |
|      |                                       | 2nd growth regulator              | 16.04.2015   | 0.5 l/ha + 0.3 l/ha              | CCC + Moddus (Trinexapac-ethyl)                                                                                                              |
|      | high nitrogen, with fungicide (HN-WF) | 1st herbicide                     | 17.03.2015   | 150 gr/ha + 0.7 l/ha + 1.5 l/ha  | Broadway + FHS + Arelon Top                                                                                                                  |
|      |                                       | 2nd herbicide                     | 11.05.2015   | 1.5 l/ha                         | MCPA                                                                                                                                         |
|      |                                       | 1st insecticide                   | 12.06.2015   | 75 ml/ha                         | Karate Zeon                                                                                                                                  |
|      |                                       | 1st fungicide                     | 07.04.2015   | 1.1 l/ha                         | Diamant (114 g/l Pyraclostrobin (F 500) + 43 g/l Epoxiconazol + 214 g/l Fenpropimorph)                                                       |
|      |                                       | 2nd fungicide                     | 17.04.2015   | 1.75 l/ha                        | Capallo (75 g/litre metrafenone+ 62.5 g/litre epoxiconazole + 200 g/litre fenpropimorph)                                                     |
|      |                                       | 3rd fungicide                     | 11.05.2015   | 1.25 l/ha                        | Input classic (160 g/l Prothioconazol 300 g/l Spiroxamine)                                                                                   |
|      |                                       | 4th fungicide                     | 27.05.2015   | 1.0 l/ha + 1.0 l/ha              | Osiris (37.5 g/l Epoxiconazol + 27.5 g/l Metconazol) + SkywayXpro (75 g/L bixafen, + 100 g/L prothioconazole + 100 g/L tebuconazole).        |
|      |                                       | 1st growth regulator              | 07.04.2015   | 1.0 l/ha                         | CCC                                                                                                                                          |
|      |                                       | 2nd growth regulator              | 16.04.2015   | 0.5 l/ha + 0.3 l/ha              | CCC + Moddus                                                                                                                                 |
| 2016 | low nitrogen, no fungicide (LN-NF)    | 1st herbicide                     | 16.11.2015   | 4.0 l/ha                         | Malibu (300 g/l Pendimethalin + 60 g/l Flufenacet)                                                                                           |
|      |                                       | 2nd herbicide                     | 08.04.2016   | 180 g/ha                         | Hoestar super (125 g/kg Amidosulfuron + 12.5 g/kg Iodosulfuron-methyl-natrium + 125 g/kg Mefenpyr-diethyl)                                   |
|      |                                       | 1st insecticide                   | 10.06.2016   | 75 ml/ha                         | Karate Zeon                                                                                                                                  |
|      | high nitrogen, no fungicide (HN-NF)   | 1st herbicide                     | 16.11.2015   | 4.0 l/ha                         | Malibu                                                                                                                                       |
|      |                                       | 2nd herbicide                     | 08.04.2016   | 180 g/ha                         | Hoestar super                                                                                                                                |
|      |                                       | 1st insecticide                   | 10.06.2016   | 75 ml/ha                         | Karate Zeon                                                                                                                                  |
|      |                                       | 1st growth regulator              | 12.04.2016   | 0.5 l/ha + 0.3 l/ha              | CCC + Moddus                                                                                                                                 |

|      |                                       |                      |            |                      |                                                                                                                  |
|------|---------------------------------------|----------------------|------------|----------------------|------------------------------------------------------------------------------------------------------------------|
| 2017 | high nitrogen, with fungicide (HN-WF) | 1st herbicide        | 16.11.2015 | 4.0 l/ha             | Malibu                                                                                                           |
|      |                                       | 2nd herbicide        | 08.04.2016 | 180 g/ha             | Hoestar super                                                                                                    |
|      |                                       | 1st insecticide      | 10.06.2016 | 75 ml/ha             | Karate Zeon                                                                                                      |
|      |                                       | 1st fungicide        | 12.04.2016 | 2.0 l/ha             | Capallo                                                                                                          |
|      |                                       | 2nd fungicide        | 20.04.2016 | 0.2 l/ha + 1.0 l/ha  | Alto (Cyproconazole ) + Bravo (500 g/l chlorothalonil)                                                           |
|      |                                       | 3rd fungicide        | 02.05.2016 | 1.2 l/ha + 1.0 l/ha  | Adexar (62.5 g/l epoxiconazole+ 62.5 g/litre fluxapyroxad); Credo (100g/l picoxystrobin + 500g/l chlorothalonil) |
|      |                                       | 4th fungicide        | 19.05.2016 | 1.0 l/ha             | Input classic                                                                                                    |
|      |                                       | 1st growth regulator | 12.04.2016 | 0.5 l/ha + 0.3 l/ha  | CCC + Moddus                                                                                                     |
|      | low nitrogen, no fungicide (LN-NF)    | 1st herbicide        | 03.11.2016 | 4.0 l/ha             | Malibu                                                                                                           |
|      |                                       | 2nd herbicide        | 15.05.2017 | 1.5l/ha              | MCPA                                                                                                             |
|      |                                       | 1st insecticide      | 02.06.2017 | 75 ml/ha             | Karate Zeon                                                                                                      |
|      | high nitrogen, no fungicide (HN-NF)   | 1st herbicide        | 03.11.2016 | 4.0 l/ha             | Malibu                                                                                                           |
|      |                                       | 2nd herbicide        | 15.05.2017 | 1.5 l/ha             | MCPA                                                                                                             |
|      |                                       | 1st insecticide      | 02.06.2017 | 75 ml/ha             | Karate Zeon                                                                                                      |
|      |                                       | 1st growth regulator | 23.03.2017 | 1.0 l/ha             | CCC                                                                                                              |
|      |                                       | 2nd growth regulator | 21.04.2017 | 0.5 l/ha + 0.3 l/ha  | CCC + Moddus                                                                                                     |
|      | high nitrogen, with fungicide (HN-WF) | 1st herbicide        | 03.11.2016 | 4.0 l/ha             | Malibu                                                                                                           |
|      |                                       | 2nd herbicide        | 15.05.2017 | 1.5 l/ha             | MCPA                                                                                                             |
|      |                                       | 1st insecticide      | 02.06.2017 | 75 ml/ha             | Karate Zeon                                                                                                      |
|      |                                       | 1st fungicide        | 24.04.2017 | 2.0 l/ha             | Capallo                                                                                                          |
|      |                                       | 2nd fungicide        | 15.05.2017 | 1.75 l/ha +1.0 l/ha  | Adexar + Credo                                                                                                   |
|      |                                       | 3rd fungicide        | 31.05.2017 | 1.25 l/ha + 1.0 l/ha | Osiris + Skyway Xpro                                                                                             |
|      |                                       | 1st growth regulator | 23.03.2017 | 1.0 l/ha             | CCC                                                                                                              |
|      |                                       | 2nd growth regulator | 21.04.2017 | 0.5 l/ha + 0.3 l/ha  | CCC + Moddus                                                                                                     |

<sup>a</sup> the active ingredient of the chemical is given in bracket the first time it appeared in the Table.

**Table S4.** Description of the measured variable in the experiments.

|                      | Traits                          | Symbols                       | Method to measure                                                                                                                                                                                                                                                                                                                                                                                   |
|----------------------|---------------------------------|-------------------------------|-----------------------------------------------------------------------------------------------------------------------------------------------------------------------------------------------------------------------------------------------------------------------------------------------------------------------------------------------------------------------------------------------------|
| Yield related traits | Grain yield                     | GY (Mg/ha)                    | Harvesting of central part of each plot was done at the end of the growing season and GY (in Mg. ha <sup>-1</sup> ) was recorded automatically with the help of combine harvester.                                                                                                                                                                                                                  |
|                      |                                 |                               | Grain moisture was immediately measured after trashing at the end of maturity phase (BBCH99) and GY was corrected to standard moisture of 14%.                                                                                                                                                                                                                                                      |
|                      | Spike number per meter square   | SNms                          | Spike numbers were counted for within one meter from all cultivars one by one before harvesting and after flowering.                                                                                                                                                                                                                                                                                |
|                      | Kernels number per spike        | KNSp                          | Kernels per spike, Kernels per m <sup>2</sup> were calculated based on the Thousand kernel weight, Spike numbers per meter square, seed weight per meter square                                                                                                                                                                                                                                     |
|                      | Kernels number per meter square | KNms                          |                                                                                                                                                                                                                                                                                                                                                                                                     |
|                      | Thousand kernel weight          | TKW (g)                       | TKW was calculated in 2016 and 2017. Three replicates of five hundred seeds were counted with the help of automatic seed counter and weighed. The average of the three replicates was multiplied by two to calculate thousand kernel weight.                                                                                                                                                        |
|                      | Harvest index                   | HI, PBWms (g/m <sup>2</sup> ) | Plants in one-meter row of every plot were manually harvested after maturity (BBCH 99) used by Voss-Fels et al. (2019) and dried in oven at 65°C for 3 days. After drying, plant biomass weight (shoot dry weight plus grain weight) and seed weight was recorded to estimate the HI as the ratio of seed weight to total biomass weight                                                            |
|                      | Plant biomass weight,           |                               |                                                                                                                                                                                                                                                                                                                                                                                                     |
| Physiological trait  | Heading date                    | HD (Days)                     | Visually recorded as number of days from 1st of January to the date when the ears from approximately 70 % of total tiller in each plot came out from flag leaf sheath at around BBCH59                                                                                                                                                                                                              |
|                      | Plant height                    | PH                            | The measurement was taken from soil to the top of the spike of the main tiller of the plant between BBCH 65-69 growth stage                                                                                                                                                                                                                                                                         |
|                      | Leaf chlorophyll contents       | SPAD                          | SPAD were measured at BBCH 45-49 using SPAD 502 Plus Chlorophyll Meter (Konica Minolta, Japan) from 3 different plants of each plot.<br>The SPAD values were recorded based on light absorption by chlorophyll between the wave length of 650 nm to 940 nm                                                                                                                                          |
| Disease incidence    | Yellow rust                     | YR                            | YR severity (leaf area covered by rust pustules) was visually scored using linear phenotyping scale from 1 to 9 according Pask et al. (2012), where 1 is the most resistant and 9 the most susceptible genotype. Scores for each plot (genotype) were estimated by reflection of the average leaf area covered with disease as well as the plot area covered by the yellow rust and their severity. |
| Grain quality traits | Grain crude protein content     | GPC (%)                       | The grain quality were analyzed using NIRS instrument (Perten, DA 7250) following the manufacturers guidelines.                                                                                                                                                                                                                                                                                     |
|                      | Grain starch content            | GSC(%)                        |                                                                                                                                                                                                                                                                                                                                                                                                     |
|                      | Sedimentation                   | Sedimentation (%)             |                                                                                                                                                                                                                                                                                                                                                                                                     |
|                      | Grain N yield                   | GNY (kg.ha <sup>-1</sup> )    | The grain N yield was calculated by dividing the grain crude protein yield by the wheat-specific protein factor of 5.7, and multiply the result by the GY                                                                                                                                                                                                                                           |

**Table S5.** Summary of analysis of variance of agronomic and grain quality traits of 220 genotypes tested in 3 different environments.

| Year                 | Traits               | Wald statistic |             |                | CV (%) | H <sup>2</sup> |
|----------------------|----------------------|----------------|-------------|----------------|--------|----------------|
|                      |                      | G              | CS          | G*CS           |        |                |
| 2015                 | Agronomic traits     |                |             |                |        |                |
|                      | GY                   | 6891.7***      | 2396.56***  | 2290.12***     | 26.66  | 0.73           |
|                      | SNms                 | 619.17**       | 313.14**    | 403.97ns       | 24.59  | 0.66           |
|                      | KNSp                 | -              | -           | -              | -      | -              |
|                      | KNms                 | -              | -           | -              | -      | -              |
|                      | TKW                  | -              | -           | -              | -      | -              |
|                      | HD                   | 3875.16**      | 131.73**    | 452.34ns       | 1.88   | 0.94           |
|                      | PH                   | 2853.91**      | 519.06**    | 393.14ns       | 10.82  | 0.96           |
|                      | HI                   | 5625.89**      | 143.5**     | 3065.83**      | 13.13  | 0.73           |
|                      | PBWms                | 413.41**       | 365.87**    | 449.19 ns      | 29.72  | 0.44           |
|                      | Physiological trait  |                |             |                |        |                |
|                      | SPAD                 | -              | -           | -              | -      | -              |
|                      | Disease incidence    |                |             |                |        |                |
|                      | YR                   | 1497.98**      | 91.29**     | 466.34ns       | 50.97  | 0.84           |
|                      | Grain quality traits |                |             |                |        |                |
|                      | GPC                  | 2083.91**      | 3655.31**   | 519.8ns        | 12.04  | 0.87           |
|                      | GSC                  | 899.82**       | 316.97**    | 431.9ns        | 2.12   | 0.76           |
|                      | Sedimentation        | 227.99 ns      | 408.07**    | 431.09ns       | 38.77  | 0.22           |
| 2016                 | Agronomic traits     |                |             |                |        |                |
|                      | GY                   | 13408.46***    | 4810.61***  | 2557.78***     | 25.6   | 0.8            |
|                      | SNms                 | 395.81**       | 254.37**    | 488.64ns       | 19.13  | 0.39           |
|                      | KNSp                 | 32.4E4***      | 34.4E3***   | 39.2E4***      | 0.301  | 0.38           |
|                      | KNms                 | 11.3E5***      | 65.8E4***   | 98.1E4***      | 0.32   | 0.55           |
|                      | TKW                  | 9751.16**      | 4636.41**   | 2154.6**       | 13.49  | 0.87           |
|                      | HD                   | 881.68**       | 119.44**    | 504.05ns       | 0.71   | 0.69           |
|                      | PH                   | 5712.85**      | 369.1**     | 1099.83**      | 10.66  | 0.91           |
|                      | HI                   | 1619.80**      | 725.85**    | 557.05**       | 12.16  | 0.69           |
|                      | PBWms                | 396.77**       | 63.09**     | 389ns          | 26.62  | 0.5            |
|                      | Physiological trait  |                |             |                |        |                |
|                      | SPAD                 | 216.1**        | 512.66**    | 416.66ns       | 10.3   | 0.60           |
|                      | Disease incidence    |                |             |                |        |                |
|                      | YR                   | 3848.78**      | 308.45**    | 579.39**       | 62.73  | 0.92           |
|                      | Grain quality traits |                |             |                |        |                |
|                      | GPC                  | 6861.23**      | 4956.56**   | 1532.27**      | 10.7   | 0.89           |
|                      | GSC                  | 574.71**       | 23.74**     | 399.47ns       | 1.41   | 0.66           |
|                      | Sedimentation        | 980.55**       | 195.82**    | 595**          | 24.1   | 0.95           |
| Table S5 (continued) |                      |                |             |                |        |                |
| Year                 | Traits               | Wald statistic |             |                | CV (%) | H <sup>2</sup> |
|                      |                      | G              | CS          | G*CS           |        |                |
| 2017                 | Agronomic traits     |                |             |                |        |                |
|                      | GY                   | 4001.76***     | 1413.27***  | 1103.88**<br>* | 17.36  | 0.75           |
|                      | SNms                 | 339.53**       | 99.85**     | 343.16ns       | 17.79  | 0.48           |
|                      | KNSp                 | 13.1E4***      | 13651.95*** | 15.4E4***      | 0.237  | 0.43           |
|                      | KNms                 | 25.7E5***      | 15.6E4***   | 28.5E4***      | 0.24   | 0.46           |
|                      | TKW                  | 14852.82**     | 190.71**    | 1898.15**      | 8.04   | 0.93           |
|                      | HD                   | 4327.21**      | 271.57**    | 412.95ns       | 1.46   | 0.95           |
|                      | PH                   | 10147.78**     | 362.09**    | 888.29**       | 11.71  | 0.95           |

|                             |           |           |           |       |      |
|-----------------------------|-----------|-----------|-----------|-------|------|
| HI                          | 1533.21** | 575.06**  | 539.66**  | 8.44  | 0.82 |
| PBWms                       | 375.31**  | 25.44**   | 467.58ns  | 20.01 | 0.38 |
| <i>Physiological trait</i>  |           |           |           |       |      |
| SPAD                        | 901.86**  | 88.85**   | 529.39ns  | 9.46  | 0.70 |
| <i>Disease incidence</i>    |           |           |           |       |      |
| YR                          | -         | -         | -         | -     | -    |
| <i>Grain quality traits</i> |           |           |           |       |      |
| GPC                         | 5857.53** | 9955.66** | 761.25**  | 11.39 | 0.93 |
| GSC                         | 2574.5**  | 665.49**  | 699.41**  | 1.26  | 0.86 |
| Sedimentation               | 9302.4**  | 2909.79** | 3171.77** | 38.91 | 0.83 |

\*\* Significant at the 0.01 probability level, \*\*\* Significant at the 0.001 probability level, † ns, nonsignificant at the 0.05 probability level

**Table S6.** Arithmetic mean and treatments effect of agronomic and grain quality traits of 220 genotypes tested in 3 different CS over three growing seasons.

| Traits                    | 2015             |                  |                  |                      |        |                 | 2016              |                   |                   |                      |        |                 | 2017              |                   |                   |                      |       |                 |
|---------------------------|------------------|------------------|------------------|----------------------|--------|-----------------|-------------------|-------------------|-------------------|----------------------|--------|-----------------|-------------------|-------------------|-------------------|----------------------|-------|-----------------|
|                           | Means            |                  |                  | Treatment effect (%) |        |                 | Means             |                   |                   | Treatment effect (%) |        |                 | Means             |                   |                   | Treatment effect (%) |       |                 |
|                           | HN-NF            | HN-WF            | LN-NF            | N                    | NF     | F <sub>HN</sub> | HN-NF             | HN-WF             | LN-NF             | N                    | NF     | F <sub>HN</sub> | HN-NF             | HN-WF             | LN-NF             | N                    | NF    | F <sub>HN</sub> |
| GY(Mg/ha)                 | 8.976 <b>b</b> * | 11.225 <b>a</b>  | 6.680 <b>c</b>   | 34.36                | 68.03  | 25.06           | 6.867 <b>b</b>    | 9.583 <b>a</b>    | 6.455 <b>c</b>    | 6.39                 | 48.46  | 39.55           | 9.678 <b>b</b>    | 10.525 <b>a</b>   | 7.410 <b>c</b>    | 30.61                | 42.03 | 8.75            |
| SNms                      | 501.69 <b>a</b>  | 493.90 <b>a</b>  | 336.88 <b>b</b>  | 48.92                | 46.61  | -1.55           | 497.44 <b>b</b>   | 525.12 <b>a</b>   | 415.20 <b>c</b>   | 19.81                | 26.48  | 5.57            | 464.65 <b>a</b>   | 455.75 <b>a</b>   | 391.67 <b>b</b>   | 18.63                | 16.36 | -1.92           |
| KNSp                      | -                | -                | -                | -                    | -      | -               | 30.87 <b>b</b>    | 34.81 <b>a</b>    | 28.70 <b>c</b>    | 7.54                 | 21.25  | 12.76           | 42.94 <b>b</b>    | 45.24 <b>a</b>    | 39.66 <b>c</b>    | 8.28                 | 14.09 | 5.36            |
| KNms                      | -                | -                | -                | -                    | -      | -               | 15171.13 <b>b</b> | 17847.11 <b>a</b> | 11648.78 <b>c</b> | 30.24                | 53.21  | 17.64           | 19562.48 <b>b</b> | 20307.22 <b>a</b> | 15290.47 <b>c</b> | 27.94                | 32.81 | 3.81            |
| TKW (g)                   | -                | -                | -                | -                    | -      | -               | 39.83 <b>c</b>    | 47.57 <b>b</b>    | 49.14 <b>a</b>    | -18.94               | -3.18  | 19.44           | 46.22 <b>c</b>    | 47.36 <b>b</b>    | 48.78 <b>a</b>    | -5.25                | -2.91 | 2.46            |
| HD (days)                 | 150.30 <b>a</b>  | 150.20 <b>a</b>  | 148.27 <b>b</b>  | 1.37                 | 1.3    | -0.07           | 154.04 <b>b</b>   | 154.73 <b>a</b>   | 153.54 <b>c</b>   | 0.33                 | 0.77   | 0.45            | 148.56 <b>a</b>   | 148.74 <b>a</b>   | 147.06 <b>b</b>   | 1.02                 | 1.15  | 0.12            |
| PH (cm)                   | 91.61 <b>a</b>   | 90.01 <b>b</b>   | 92.50 <b>a</b>   | -0.96                | -2.69  | -1.75           | 91.12 <b>c</b>    | 93.66 <b>b</b>    | 99.43 <b>a</b>    | -8.36                | -5.8   | 2.79            | 87.47 <b>b</b>    | 87.86 <b>b</b>    | 94.48 <b>a</b>    | -7.43                | -7.01 | 0.45            |
| HI                        | 0.51 <b>b</b>    | 0.55 <b>a</b>    | 0.48 <b>c</b>    | 5.97                 | 15.05  | 8.57            | 0.46 <b>b</b>     | 0.51 <b>a</b>     | 0.45 <b>c</b>     | 2.01                 | 13.43  | 11.19           | 0.58 <b>b</b>     | 0.60 <b>a</b>     | 0.54 <b>c</b>     | 6.69                 | 10.83 | 3.89            |
| PBWms (g/m <sup>2</sup> ) | 1566.62 <b>b</b> | 1774.60 <b>a</b> | 1031.14 <b>c</b> | 51.93                | 72.1   | 13.28           | 1302.53 <b>b</b>  | 1661.50 <b>a</b>  | 1266.59 <b>b</b>  | 2.84                 | 31.18  | 27.56           | 1561.35 <b>a</b>  | 1596.43 <b>a</b>  | 1382.99 <b>b</b>  | 12.9                 | 15.43 | 2.25            |
| SPAD                      | -                | -                | -                | -                    | -      | -               | 50.50 <b>b</b>    | 55.43 <b>a</b>    | 46.15 <b>c</b>    | 9.41                 | 20.09  | 9.77            | 52.40 <b>a</b>    | 51.25 <b>b</b>    | 47.99 <b>c</b>    | 9.18                 | 6.78  | -2.2            |
| YR                        | 2.17 <b>b</b>    | 1.73 <b>c</b>    | 2.95 <b>a</b>    | -26.59               | -41.29 | -20.02          | 1.58 <b>b</b>     | 1.44 <b>b</b>     | 2.33 <b>a</b>     | -32.3                | -38.08 | -8.54           | -                 | -                 | -                 | -                    | -     | -               |
| GPC (%)                   | 14.42 <b>b</b>   | 14.63 <b>a</b>   | 11.61 <b>c</b>   | 24.22                | 26.03  | 1.46            | 12.35 <b>b</b>    | 12.61 <b>a</b>    | 10.41 <b>c</b>    | 18.71                | 21.18  | 2.08            | 14.20 <b>b</b>    | 14.60 <b>a</b>    | 11.51 <b>c</b>    | 23.39                | 26.85 | 2.8             |
| GSC (%)                   | 74.25 <b>a</b>   | 72.38 <b>b</b>   | 72.44 <b>b</b>   | 2.49                 | -0.08  | -2.51           | 73.67 <b>a</b>    | 73.32 <b>b</b>    | 73.27 <b>b</b>    | 0.55                 | 0.07   | -0.47           | 74.04 <b>b</b>    | 73.17 <b>c</b>    | 74.32 <b>a</b>    | -0.37                | -1.54 | -1.18           |
| Sedimentation (%)         | 34.56 <b>a</b>   | 34.71 <b>a</b>   | 16.20 <b>b</b>   | 113.31               | 114.24 | 0.44            | 34.6 <b>b</b>     | 35.7 <b>a</b>     | 25.3 <b>c</b>     | 36.76                | 41.11  | 3.181           | 39.37 <b>a</b>    | 38.22 <b>a</b>    | 19.41 <b>b</b>    | 102.82               | 96.87 | -2.93           |

\* Means values within a year in the same row line with different letters indicate a significant difference at  $P < 0.05$

N means nitrogen effect, NF means nitrogen plus fungicide effect, and F<sub>HN</sub> means fungicide effect under low and high nitrogen

**Table S7.** GY (Mg.ha<sup>-1</sup>) statistics for the applied cropping systems and the years of experiments.

| Year                   | CS    | Mean   | Maximum | Minimum | Range | CV (%)* |
|------------------------|-------|--------|---------|---------|-------|---------|
| 2015                   | HN-NF | 8.976  | 12.511  | 2.051   | 10.46 | 22.47   |
|                        | HN-WF | 11.225 | 14.073  | 7.916   | 6.157 | 9.54    |
|                        | LN-NF | 6.68   | 9.62    | 2.155   | 7.465 | 18.79   |
| 2016                   | HN-NF | 6.867  | 9.645   | 1.239   | 8.406 | 23.03   |
|                        | HN-WF | 9.524  | 12.217  | 4.127   | 8.09  | 13.43   |
|                        | LN-NF | 6.393  | 8.569   | 1.751   | 6.818 | 19.25   |
| 2017                   | HN-NF | 9.678  | 11.996  | 5.856   | 6.14  | 10.97   |
|                        | HN-WF | 10.525 | 12.367  | 7.619   | 4.748 | 7.72    |
|                        | LN-NF | 7.41   | 9.424   | 4.635   | 4.989 | 11.16   |
| Average of three years | HN-NF | 8.507  | 11.384  | 3.049   | 8.335 | 18.82   |
|                        | HN-WF | 10.425 | 12.886  | 6.554   | 6.332 | 10.23   |
|                        | LN-NF | 6.828  | 9.204   | 2.847   | 6.424 | 16.4    |

\*CV stands for coefficient of variation



**Table S8.** Detailed analysis of variance of GY of winter wheat genotypes in cropping systems (CS) by year (Y).

| Year                         |     | 2015       |                |                      | 2016      |                |                      | 2017     |                |                      |
|------------------------------|-----|------------|----------------|----------------------|-----------|----------------|----------------------|----------|----------------|----------------------|
| Source                       | DF  | Anova SS   | Mean Square    | % Variance Explained | Anova SS  | Mean Square    | % Variance Explained | Anova SS | Mean Square    | % Variance Explained |
| <b>Cropping systems (CS)</b> | 2   | 454374.824 | 227187.4121*** | 70.9                 | 250658.57 | 125329.2852*** | 61.36                | 228223   | 114111.6963*** | 77.15                |
| <b>Genotype(G)</b>           | 219 | 221449.968 | 1011.1871***   | 19.67                | 208916.91 | 953.9585***    | 29.85                | 83031.4  | 379.139***     | 16.36                |
| <b>CS×G</b>                  | 438 | 66754.6403 | 152.4079***    | 9.44                 | 37041.749 | 84.5702***     | 8.8                  | 21640.8  | 49.4083***     | 6.5                  |
| <b>Error</b>                 | 660 | 9913.6521  | 15.0207        |                      | 2135.0851 | 3.235          |                      | 3818.17  | 5.7851         |                      |

\*\*\* Significant at the 0.0001 probability level, DF=Degree of freedom

**Table S9.** Three ways ANOVA of GY of winter wheat genotypes (G) in three cropping systems (CS) across three years (Y).

| Source        | DF   | Anova SS    | Mean Square  | % Variance Explained | F Value |
|---------------|------|-------------|--------------|----------------------|---------|
| <b>Y</b>      | 2    | 198589.9929 | 99295.00***  | 10.38                | 12390.8 |
| <b>CS</b>     | 2    | 855052.0568 | 427526.03*** | 54.45                | 53350.1 |
| <b>G</b>      | 219  | 439141.9294 | 2005.21***   | 16.22                | 250.23  |
| <b>Y×CS</b>   | 4    | 78204.7304  | 19551.18***  | 7.89                 | 2439.75 |
| <b>Y×G</b>    | 438  | 74256.3878  | 169.5351***  | 3.3                  | 21.16   |
| <b>CS×G</b>   | 438  | 80519.4934  | 183.83***    | 4.03                 | 22.94   |
| <b>Y×CS×G</b> | 1314 | 44917.7155  | 51.2759 ***  | 3.74                 | 11.32   |
| <b>Error</b>  | 1980 | 15866.908   | 8.014***     |                      |         |

**Table S10.** N flow related analysis of variance and statistics.

(A) Combined ANOVA of NUE, NAE, and Grain N yield of winter wheat genotypes (G) in three cropping systems (E) across three years (Y).

| Anova Factors               | Fvalue (NUE) | Fvalue (NAE) | Fvalue (Grain N yield) |
|-----------------------------|--------------|--------------|------------------------|
| <b>Year (Y)</b> ***         | 156.94***    | 4.16E+09***  | 9523.02***             |
| <b>Cropping System (CS)</b> | 35649.5***   | 1.35E+10***  | 29853.64***            |
| <b>Genotype (G)</b>         | 28.76***     | 1.27E+07***  | 42.78***               |
| <b>Y×G</b>                  | 3            | 7661408      | 6.32***                |
| <b>Y×CS</b>                 | 1103.28***   | 8.13E+08***  | 1030.96***             |
| <b>CS×G</b>                 | 6.18***      | 1.67E+07***  | 7.57***                |
| <b>Y×CS×G</b>               | 1.32***      | 2867525***   | 2.18***                |

\*\*\* Significant at the 0.001 probability level

(B) Cultivars harvested GY (Mg.ha<sup>-1</sup>) and grain nitrogen yield (GNY in kg.ha<sup>-1</sup>) under the three CS.

| Genotypes<br>Name | Briwecs Number | GY <sup>a</sup> (HN-NF) | GY(HN-WF) | GY(LN-NF) | GNY <sup>b</sup> (HN-NF) | GNY (HN-WF) | GNY (LN-NF) |
|-------------------|----------------|-------------------------|-----------|-----------|--------------------------|-------------|-------------|
| Einstein          | 1              | 9.789                   | 11.019    | 7.455     | 229.7                    | 264.23      | 145.05      |
| Oakley            | 2              | 6.093                   | 12.2      | 7.033     | 133.1                    | 264.43      | 124.74      |
| Jafet             | 3              | 9.973                   | 10.406    | 7.055     | 235.14                   | 263.43      | 138.36      |
| Claire            | 4              | 9.771                   | 11.46     | 8.394     | 228.36                   | 269.04      | 150.07      |
| Rebell            | 5              | 10.455                  | 10.847    | 8.031     | 260.26                   | 266.48      | 156.5       |
| Memory            | 6              | 10.153                  | 10.821    | 7.826     | 238.57                   | 245.86      | 151.55      |
| Kurt              | 7              | 9.377                   | 11.743    | 7.804     | 221.58                   | 291.37      | 145.69      |
| Zappa             | 8              | 10.836                  | 11.179    | 7.976     | 251.64                   | 271.29      | 155.82      |
| Chevalier         | 9              | 9.334                   | 10.335    | 7.242     | 228.16                   | 250.84      | 142.95      |
| Gordian           | 10             | 9.785                   | 10.591    | 7.253     | 246.12                   | 245.53      | 135.58      |
| Mentor            | 11             | 10.382                  | 11.541    | 7.276     | 247.91                   | 279.7       | 134.75      |
| Meister           | 12             | 8.488                   | 11.161    | 7.511     | 203.72                   | 282.75      | 143.09      |
| KWS Santiago      | 13             | 9.041                   | 12.11     | 7.818     | 205.44                   | 272.84      | 138.24      |
| Brigand           | 14             | 8.453                   | 10.281    | 7.21      | 213.16                   | 256.41      | 141.54      |
| Profilus          | 15             | 9.134                   | 10.778    | 7.418     | 213.35                   | 259.19      | 137.59      |
| Durin             | 16             | 8.238                   | 9.858     | 7.197     | 201.91                   | 248.61      | 137.96      |
| KWS Pius          | 17             | 10.184                  | 11.152    | 8.101     | 248.01                   | 277.55      | 159.21      |
| Paroli            | 18             | 8.473                   | 11.259    | 7.521     | 199.16                   | 271.37      | 142.86      |
| Estivus           | 19             | 9.227                   | 11.013    | 7.849     | 218.13                   | 268.56      | 148.11      |
| Kronjuwel         | 20             | 7.636                   | 9.34      | 6.022     | 184.56                   | 242.31      | 125.79      |
| Desamo            | 21             | 9.559                   | 10.521    | 7.283     | 232.69                   | 258.41      | 141.05      |
| Carenius          | 22             | 9.242                   | 11.057    | 7.252     | 216.88                   | 259.18      | 141.7       |
| Mulan             | 23             | 9.751                   | 11.286    | 7.922     | 232.07                   | 267.58      | 144.09      |
| Kredo             | 24             | 9.435                   | 11.364    | 7.495     | 232.72                   | 264.91      | 143.86      |
| Nelson            | 25             | 9.63                    | 10.287    | 6.396     | 239.39                   | 263.93      | 127.06      |
| Patras            | 26             | 10.03                   | 10.789    | 7.355     | 243.5                    | 267.27      | 145.41      |
| Götz              | 27             | 8.211                   | 10.083    | 6.024     | 200.6                    | 256.67      | 120.72      |
| Robigus           | 28             | 5.874                   | 11.276    | 6.216     | 137.01                   | 267.76      | 118.96      |
| Anapolis          | 29             | 10.438                  | 11.478    | 7.705     | 255.14                   | 275.73      | 144.51      |
| Solstice          | 30             | 8.194                   | 10.76     | 7.256     | 199.13                   | 253.68      | 139.82      |
| Biscay            | 31             | 9.448                   | 11.566    | 7.612     | 223.04                   | 271.69      | 141.37      |
| Capone            | 32             | 10.092                  | 10.652    | 7.994     | 246.89                   | 254.56      | 153.39      |
| Tabasco           | 33             | 10.862                  | 12.019    | 8.315     | 242.94                   | 280.31      | 156.22      |
| Kometus           | 34             | 7.485                   | 11.117    | 6.699     | 184.25                   | 266.67      | 126.81      |
| Cubus             | 35             | 9.76                    | 10.812    | 7.204     | 231.55                   | 255.77      | 137.04      |
| Edward            | 36             | 9.397                   | 11.603    | 8.134     | 226.86                   | 284.69      | 158.91      |
| Famulus           | 37             | 9.155                   | 9.979     | 6.749     | 223.1                    | 252.75      | 132.06      |
| Dekan             | 38             | 8.715                   | 10.781    | 7.864     | 203.62                   | 259.88      | 154.86      |
| SW Topper         | 39             | 9.39                    | 10.126    | 6.446     | 233.44                   | 265.69      | 129.11      |
| Matrix            | 40             | 8.061                   | 11.093    | 7.036     | 194.89                   | 271.6       | 136.76      |
| Jenga             | 41             | 8.977                   | 11.156    | 7.933     | 208.69                   | 263.64      | 148.17      |
| Linus             | 42             | 10.432                  | 11.566    | 7.823     | 253.39                   | 271.97      | 152.52      |
| TJB 990-15        | 43             | 9.382                   | 10.264    | 7.009     | 227.1                    | 250.95      | 141.3       |
| Forum             | 44             | 9.869                   | 11.085    | 7.426     | 232.37                   | 272.2       | 146.54      |
| Colonia           | 45             | 9.983                   | 11.062    | 7.486     | 240.34                   | 268.37      | 148.08      |
| Transit           | 46             | 8.76                    | 10.684    | 7.533     | 213.66                   | 271.93      | 147.13      |
| Potenzial         | 47             | 9.463                   | 10.85     | 7.337     | 223.98                   | 256.72      | 145.92      |
| Gacho             | 48             | 9.878                   | 11.623    | 8.034     | 234.99                   | 275.68      | 148.99      |
| Tarso             | 49             | 8.976                   | 10.332    | 6.649     | 215.78                   | 266.14      | 133.3       |
| Hermann           | 50             | 8.224                   | 10.637    | 7.091     | 195.11                   | 266.72      | 137.79      |

|                   |     |        |        |       |        |        |        |
|-------------------|-----|--------|--------|-------|--------|--------|--------|
| Glaucus           | 51  | 9.646  | 10.959 | 7.575 | 245.09 | 269.1  | 147.89 |
| Tuareg            | 52  | 9.538  | 11.3   | 7.419 | 225.92 | 278.18 | 134.91 |
| Atomic            | 53  | 10.285 | 11.314 | 7.739 | 247.33 | 270.89 | 151.74 |
| Tobak             | 54  | 9.937  | 12.288 | 8.571 | 225.36 | 293.89 | 156.24 |
| Pionier           | 55  | 9.464  | 10.932 | 7.248 | 228.62 | 259.93 | 139.9  |
| Manager           | 56  | 8.847  | 10.883 | 7.709 | 218.08 | 256.15 | 142.14 |
| Gourmet           | 57  | 8.933  | 10.047 | 6.311 | 226.29 | 255.11 | 123.66 |
| Limes             | 58  | 9.702  | 10.984 | 7.399 | 238.72 | 281.05 | 146.55 |
| Ritmo             | 59  | 8.741  | 10.701 | 6.942 | 209.23 | 264.24 | 135.74 |
| Kalahari          | 60  | 10.057 | 11.121 | 7.56  | 232.07 | 267.23 | 147.95 |
| Intro             | 61  | 10.263 | 11.064 | 7.925 | 242.29 | 261.65 | 151.59 |
| Oxal              | 62  | 9.868  | 10.893 | 7.632 | 239.2  | 263.68 | 142.6  |
| Zobel             | 63  | 8.289  | 10.866 | 6.525 | 197.78 | 268.29 | 126.51 |
| Event             | 64  | 9.46   | 10.615 | 6.469 | 225.46 | 257.36 | 133.76 |
| Joker             | 65  | 9.453  | 10.663 | 7.403 | 222    | 249.04 | 147.51 |
| Global            | 66  | 9.513  | 11.666 | 7.498 | 222.8  | 273.48 | 141.29 |
| Elixer            | 67  | 10.566 | 11.706 | 7.759 | 251.89 | 280.35 | 151.9  |
| Fedor             | 68  | 9.946  | 10.76  | 7.899 | 227.1  | 254.94 | 152.88 |
| Türkis            | 69  | 9.108  | 11.1   | 7.337 | 210.74 | 255.32 | 140.76 |
| Skagen            | 70  | 9.327  | 10.79  | 7.66  | 223.77 | 262.48 | 147.69 |
| Greif             | 71  | 9.364  | 10.46  | 7.56  | 225.3  | 249.83 | 144.55 |
| Esket             | 72  | 10.023 | 10.661 | 7.013 | 236.46 | 254.33 | 138.05 |
| Primus            | 73  | 8.796  | 11.116 | 7.257 | 201.9  | 261.34 | 139.16 |
| Skalmeje          | 74  | 9.672  | 11.343 | 7.368 | 222.88 | 266.47 | 139.98 |
| Genius            | 75  | 9.59   | 10.49  | 6.776 | 237.83 | 263.78 | 135.68 |
| Enorm             | 76  | 8.867  | 10.011 | 6.621 | 216.54 | 250.14 | 131.7  |
| Florian           | 77  | 9.257  | 10.192 | 7.118 | 223.88 | 255.29 | 151.14 |
| Skater            | 78  | 7.447  | 10.984 | 6.846 | 169.58 | 257.52 | 133.21 |
| Brilliant         | 79  | 9.025  | 10.824 | 7.346 | 210.54 | 266.26 | 140.78 |
| Inspiration       | 80  | 9.421  | 11.143 | 7.448 | 216.82 | 270.71 | 146.08 |
| Apertus           | 81  | 10.026 | 11.025 | 7.634 | 239.07 | 269.44 | 149.45 |
| Ellvis            | 82  | 9.231  | 10.698 | 8.053 | 226.04 | 267.53 | 158.47 |
| Edgar             | 83  | 10.04  | 11.296 | 7.829 | 234.89 | 274.87 | 148.85 |
| Maris<br>Huntsman | 84  | 8.671  | 10.713 | 6.627 | 208.79 | 265.4  | 130.73 |
| SY Ferry          | 85  | 10.082 | 11.147 | 8.167 | 245.13 | 275.58 | 155.86 |
| Landsknecht       | 86  | 8.204  | 11.698 | 7.317 | 189.48 | 264    | 136.09 |
| Sponsor           | 87  | 8.39   | 10.462 | 7.49  | 200.37 | 245.85 | 144.36 |
| Impression        | 88  | 9.792  | 11.123 | 7.707 | 236.81 | 267.68 | 148.76 |
| Winnetou          | 89  | 8.59   | 11.504 | 6.932 | 207.06 | 271.48 | 131.56 |
| Toronto           | 90  | 8.7    | 10.227 | 6.973 | 222.66 | 256.68 | 140.21 |
| Torrild           | 91  | 9.621  | 10.74  | 7.342 | 230.47 | 265.91 | 141.41 |
| Contra            | 92  | 8.81   | 11.107 | 7.797 | 209.69 | 274.9  | 152.94 |
| Schamane          | 93  | 8.676  | 10.475 | 6.63  | 206.3  | 261.38 | 129.56 |
| Granada           | 94  | 4.274  | 10.113 | 4.711 | 101.69 | 240.93 | 93.44  |
| KWS Cobalt        | 95  | 10.259 | 11.057 | 8.461 | 236.1  | 250.43 | 162.71 |
| Tommi             | 96  | 9.611  | 10.71  | 7.468 | 233.35 | 270.77 | 147.95 |
| Saturn            | 97  | 8.225  | 10.47  | 6.797 | 194.34 | 246.99 | 131.59 |
| Severin           | 98  | 6.576  | 9.556  | 5.862 | 162.41 | 242.07 | 121.32 |
| JB Asano          | 99  | 7.571  | 10.881 | 6.558 | 174.03 | 266.89 | 126.96 |
| Kerubino          | 100 | 8.77   | 11.145 | 6.879 | 206.99 | 265.84 | 137.03 |
| Arktis            | 101 | 8.789  | 10.543 | 6.914 | 211.02 | 247.81 | 129.18 |
| Urban             | 102 | 7.942  | 9.809  | 6.547 | 192.17 | 243.56 | 125.74 |
| Orestis           | 103 | 8.687  | 10.718 | 7.355 | 204.72 | 254.26 | 137.71 |

|                     |     |       |        |       |        |        |        |
|---------------------|-----|-------|--------|-------|--------|--------|--------|
| Flair               | 104 | 7.594 | 10.532 | 6.727 | 177.16 | 252.72 | 122.55 |
| Anthus              | 105 | 9.527 | 11.304 | 8.027 | 222    | 266.13 | 146.97 |
| Bombus              | 106 | 9.416 | 11.398 | 7.728 | 224.85 | 272.9  | 143.67 |
| Lucius              | 107 | 9.047 | 10.399 | 6.722 | 216.4  | 254.47 | 132.55 |
| Herzog              | 108 | 8.263 | 10.673 | 7.014 | 193.2  | 254.6  | 128.94 |
| Sorbas              | 109 | 8.278 | 9.903  | 6.471 | 205.3  | 253.02 | 131.41 |
| Tabor               | 110 | 8.307 | 9.112  | 6.35  | 207.74 | 227.11 | 124.89 |
| Terrier             | 111 | 8.199 | 10.854 | 7.405 | 189.91 | 255.85 | 137.29 |
| Magister            | 112 | 8.007 | 9.959  | 6.11  | 199.81 | 255.2  | 117.74 |
| Altos               | 113 | 9.195 | 9.993  | 6.507 | 219.15 | 254.08 | 130.17 |
| Progress            | 114 | 8.558 | 9.796  | 6.667 | 206.3  | 238.67 | 126.72 |
| Xanthippe           | 115 | 8.968 | 11.44  | 7.062 | 212.42 | 269.51 | 132.87 |
| Avenir              | 116 | 9.64  | 10.631 | 7.35  | 231.44 | 252.47 | 146.83 |
| Pantus              | 117 | 7.415 | 10.573 | 6.47  | 176.38 | 256.57 | 128.06 |
| Drifter             | 118 | 8.822 | 11.031 | 8.027 | 212.61 | 263.52 | 151.36 |
| Joss                | 119 | 8.555 | 9.596  | 6.305 | 207.68 | 244.45 | 126.49 |
| Kranich             | 120 | 7.429 | 9.666  | 6.223 | 178.63 | 233.57 | 117.72 |
| Sperber             | 121 | 9.274 | 10.279 | 6.404 | 227    | 260.71 | 124.43 |
| Discus              | 122 | 8.09  | 10.601 | 7.096 | 195.28 | 263.67 | 138.94 |
| Helios              | 123 | 3.709 | 9.675  | 4.265 | 92.02  | 239.49 | 84.71  |
| Obelisk             | 124 | 8.588 | 10.956 | 6.872 | 213.13 | 265.53 | 129.52 |
| Magnus              | 125 | 8.315 | 10.856 | 6.977 | 192.3  | 259.04 | 141.31 |
| Disponent           | 126 | 8.447 | 10.49  | 6.81  | 203.15 | 269.15 | 135.97 |
| Tambor              | 127 | 8.801 | 10.051 | 6.555 | 215.76 | 252.24 | 133.37 |
| Boxer               | 128 | 8.936 | 11.161 | 7.215 | 203.03 | 264.25 | 136.74 |
| Sokrates            | 129 | 9.194 | 11.199 | 7.042 | 222.95 | 267.57 | 135.82 |
| Carisuper           | 130 | 7.854 | 9.295  | 6.231 | 192.03 | 235.43 | 127.07 |
| Rektor              | 131 | 7.112 | 9.906  | 6.086 | 168.08 | 248.37 | 122.81 |
| Alves               | 132 | 9.876 | 10.923 | 8.01  | 231.5  | 257.97 | 151.65 |
| NaturaStar          | 133 | 7.431 | 9.694  | 6.176 | 176.75 | 243.22 | 124.53 |
| Alidos              | 134 | 8.819 | 9.906  | 6.313 | 217.37 | 251.09 | 130.26 |
| Monopol             | 135 | 7.485 | 9.272  | 6.189 | 176.5  | 233.55 | 128.64 |
| Akratos             | 136 | 9.051 | 11.191 | 7.445 | 208.53 | 272.46 | 149.84 |
| Knirps              | 137 | 7.319 | 9.729  | 6.453 | 180.21 | 241.65 | 126.5  |
| Bussard             | 138 | 8.143 | 9.74   | 6.336 | 199.58 | 249.85 | 127.95 |
| Oberst              | 139 | 7.541 | 10.419 | 6.251 | 183.5  | 256.65 | 125.91 |
| Cappelle<br>Desprez | 140 | 7.73  | 8.66   | 6.209 | 197.59 | 234.27 | 127.77 |
| Tiger               | 141 | 9.248 | 10.632 | 7.186 | 222.05 | 267.44 | 148.16 |
| Ibis                | 142 | 9.308 | 10.127 | 7.185 | 231.05 | 244.22 | 147.42 |
| Batis               | 143 | 8.74  | 10.593 | 7.29  | 202.28 | 257.78 | 140.55 |
| Topfit              | 144 | 8.013 | 9.722  | 6.695 | 191.95 | 245.72 | 132.79 |
| Akteur              | 145 | 8.055 | 10.292 | 6.432 | 196.54 | 268.13 | 131.7  |
| Ludwig              | 146 | 8.973 | 10.625 | 7.058 | 218.75 | 260.98 | 140.41 |
| Asketis             | 147 | 8.222 | 10.826 | 6.721 | 192.14 | 256.14 | 131.04 |
| Aristos             | 148 | 7.983 | 10.524 | 7.077 | 192.5  | 257.09 | 138.42 |
| Zentos              | 149 | 8.529 | 10.107 | 6.914 | 202.26 | 253.21 | 133.17 |
| Diplomat            | 150 | 7.499 | 9.344  | 6.39  | 182.22 | 231.56 | 127.35 |
| Astron              | 151 | 8.365 | 9.867  | 6.907 | 204.17 | 256.91 | 142.09 |
| Basalt              | 152 | 7.318 | 9.462  | 6.465 | 175.01 | 233.51 | 124.87 |
| Kormoran            | 153 | 7.815 | 9.845  | 6.477 | 192.28 | 247.67 | 131.09 |
| Aron                | 154 | 8.264 | 10.067 | 6.696 | 203.71 | 255.35 | 137.4  |
| KWS<br>Milaneco     | 155 | 8.062 | 9.926  | 6.507 | 197.99 | 242.28 | 133.13 |

|                      |     |        |        |       |        |        |        |
|----------------------|-----|--------|--------|-------|--------|--------|--------|
| Aszita               | 156 | 7.499  | 8.503  | 5.72  | 193.23 | 234.97 | 122.42 |
| Kobold               | 157 | 8.136  | 9.408  | 6.309 | 196.08 | 245.23 | 122.94 |
| Carimulti            | 158 | 8.313  | 9.116  | 6.395 | 206.32 | 246.06 | 127.47 |
| Admiral              | 159 | 7.955  | 9.489  | 6.31  | 188.95 | 237.45 | 124.86 |
| Vuka                 | 160 | 7.056  | 9.903  | 6.08  | 167.89 | 248.4  | 121.45 |
| Benno                | 161 | 7.345  | 9.693  | 6.526 | 181.22 | 247.04 | 135.78 |
| Apollo               | 162 | 8.33   | 10.387 | 6.795 | 198.63 | 250.95 | 132    |
| Aquila               | 163 | 6.79   | 10.095 | 5.942 | 159.86 | 245.36 | 115.4  |
| Kanzler              | 164 | 7.279  | 10.337 | 6.269 | 168.75 | 259.29 | 126.58 |
| Kraka                | 165 | 7.401  | 10.178 | 6.433 | 178.02 | 245.45 | 125.86 |
| Caribo               | 166 | 7.377  | 9.835  | 6.258 | 182.64 | 250.12 | 126.14 |
| Butaro               | 167 | 7.674  | 8.671  | 5.637 | 199.24 | 238.01 | 119.78 |
| Konsul               | 168 | 7.203  | 8.435  | 5.822 | 186.78 | 225.28 | 122.55 |
| Ares                 | 169 | 7.319  | 10.339 | 6.238 | 170.8  | 256.13 | 125.47 |
| Centurk              | 170 | 4.704  | 8.449  | 4.75  | 122.13 | 219.48 | 96.95  |
| NS 22/92             | 171 | 7.844  | 8.621  | 6.783 | 202.24 | 223.01 | 137.98 |
| Benni<br>multifloret | 172 | 4.837  | 7.77   | 4.37  | 121.17 | 202.76 | 90.54  |
| Hope                 | 173 | 5.18   | 8.176  | 4.201 | 127.71 | 213.32 | 90.24  |
| Vel                  | 174 | 5.795  | 7.504  | 4.646 | 157.25 | 205.81 | 102.71 |
| Phoenix              | 175 | 4.395  | 8.4    | 3.926 | 110.69 | 226.47 | 83.93  |
| Mironovska<br>808    | 176 | 6.081  | 8.51   | 4.455 | 158.22 | 224.71 | 92.92  |
| Caphorn              | 177 | 9.759  | 10.607 | 7.375 | 244.79 | 264.01 | 147.6  |
| Cordiale             | 178 | 9.041  | 10.782 | 7.581 | 211.57 | 251.57 | 152.62 |
| Apache               | 179 | 9.883  | 11.452 | 7.248 | 239.75 | 271.63 | 138.2  |
| Premio               | 180 | 10.124 | 11.167 | 6.926 | 249.21 | 275.08 | 131.76 |
| Isengrain            | 181 | 9.511  | 10.766 | 7.035 | 235.19 | 253.93 | 139.45 |
| Alixan               | 182 | 8.099  | 11.274 | 6.667 | 188.09 | 275.59 | 130.8  |
| Boregar              | 183 | 9.424  | 11.271 | 7.712 | 226.11 | 268.61 | 148.52 |
| Renesansa            | 184 | 6.04   | 8.861  | 5.444 | 154.53 | 230.71 | 113.57 |
| Tremie               | 185 | 8.933  | 11.082 | 7.201 | 214.43 | 264.09 | 140.42 |
| KWS Ferrum           | 186 | 8.916  | 11.654 | 7.549 | 216.93 | 264.79 | 141.17 |
| Triple Dirk "S"      | 187 | 6.807  | 8.951  | 5.305 | 170.99 | 223.34 | 106.49 |
| Cardos               | 188 | 7.424  | 10.217 | 6.24  | 183.44 | 253.63 | 127.19 |
| Soissons             | 189 | 8.858  | 9.973  | 6.384 | 223.88 | 244.81 | 126.82 |
| BCD 1302/83          | 190 | 5.377  | 9.47   | 5.019 | 136.92 | 248.82 | 104.38 |
| Arlequin             | 191 | 10.018 | 11.435 | 8.054 | 230.96 | 259.5  | 150.34 |
| Sonalika             | 192 | 6.703  | 9.554  | 5.983 | 160.06 | 226.35 | 116.87 |
| Camp Remy            | 193 | 8.608  | 10.06  | 6.379 | 217.92 | 250.74 | 130.42 |
| Cajeme 71            | 194 | 3.308  | 8.943  | 3.714 | 83.32  | 239.35 | 76.34  |
| Avalon               | 195 | 8.147  | 9.11   | 6.318 | 203.67 | 227.38 | 133.77 |
| Ivanka               | 196 | 3.694  | 9.577  | 3.768 | 87.57  | 236.34 | 76.6   |
| Pobeda               | 197 | 6.686  | 9.038  | 5.337 | 175.02 | 244.23 | 114.35 |
| NS 66/92             | 198 | 7.683  | 8.908  | 5.682 | 199.15 | 230.21 | 118.14 |
| Mexico 3             | 199 | 7.482  | 9.315  | 5.804 | 187.43 | 235.55 | 118.41 |
| Orcas                | 200 | 7.966  | 10.869 | 7.239 | 189.29 | 269.99 | 143.3  |
| Nimbus               | 201 | 6.016  | 9.96   | 5.415 | 147.12 | 241.5  | 113.91 |
| Muskat               | 202 | 10.449 | 10.994 | 7.592 | 265.96 | 262.59 | 143.71 |
| Florida              | 203 | 6.939  | 9.063  | 5.549 | 177.29 | 230.96 | 113.86 |
| Rumor                | 204 | 9.129  | 11.713 | 7.404 | 219.85 | 267.09 | 143.45 |
| Highbury             | 205 | 7.139  | 8.341  | 5.637 | 184.61 | 221.44 | 119.2  |
| Siete Cerros 66      | 206 | 4.03   | 9.378  | 4.632 | 104.28 | 245.57 | 95.12  |
| Kontrast             | 207 | 8.883  | 9.973  | 6.409 | 220.64 | 256.69 | 133.28 |

|               |     |        |        |       |        |        |        |
|---------------|-----|--------|--------|-------|--------|--------|--------|
| WW 4180       | 208 | 8.904  | 10.454 | 6.808 | 218.88 | 253.84 | 132.37 |
| INTRO 615     | 209 | 7.077  | 8.521  | 6.017 | 182.59 | 215.37 | 124.93 |
| NS 46/90      | 210 | 4.592  | 9.434  | 3.926 | 122.7  | 257.33 | 84.52  |
| Mex. 17 bb    | 211 | 7.003  | 8.35   | 5.504 | 181.65 | 218.75 | 113.11 |
| Labriego-Inia | 212 | 6.627  | 9.401  | 4.731 | 163.5  | 237.98 | 96.92  |
| Pegassos      | 213 | 8.172  | 10.589 | 6.818 | 195.51 | 254.66 | 135.27 |
| Hybred        | 214 | 9.655  | 11.119 | 7.221 | 226.74 | 261.38 | 140.75 |
| Hyland        | 215 | 9.89   | 11.721 | 7.866 | 231.32 | 266    | 154.36 |
| Hybery        | 216 | 10.741 | 12.043 | 8.268 | 253.75 | 272.97 | 154.85 |
| Hystar        | 217 | 10.314 | 11.729 | 7.691 | 248.35 | 269.3  | 143.87 |
| Hylux         | 218 | 10.18  | 11.803 | 8.711 | 234.84 | 263.24 | 155.86 |
| Piko          | 219 | 8.949  | 9.734  | 6.626 | 221.59 | 233.09 | 127.76 |
| SUR 99820     | 220 | 9.074  | 11.329 | 7.748 | 207.38 | 261.31 | 144.05 |

(C) Summary of three years averages of grain nitrogen yield (GNY in kg.ha<sup>-1</sup>) under the three CS.

| Yielding Status       | GNY (HN-NF) | GNY(HN-WF) | GNY(LN-NF) |
|-----------------------|-------------|------------|------------|
| High Yielding         | 234.16      | 269.45     | 148.89     |
| Low Yielding          | 197.56      | 252.10     | 130.04     |
| Mean                  | 215.86      | 260.775    | 139.465    |
| Difference (High-Low) | 36.60       | 17.36      | 18.84      |

(D) Summary of three years averages nitrogen flow under the three CS and correlations coefficient between GY and GNY under each CS.

| Treatment | GY (Mg/ha) | GNY (kg/ha) | Nitrogen available (kg/ha) | Applied N fertilizer | <sup>a</sup> Utilized N from fertilizer (kg/ha) | Lost N from N fertilizer (kg/ha) | <sup>b</sup> N utilized for 1 Mg grain | Corr |
|-----------|------------|-------------|----------------------------|----------------------|-------------------------------------------------|----------------------------------|----------------------------------------|------|
| HN-NF     | 8.51       | 205.21      | 220.00                     | 151.67               | 72.8                                            | 78.87                            | 25.86                                  | 0.98 |
| HN-WF     | 10.44      | 255.72      | 220.00                     | 151.67               | 72.8                                            | 78.87                            | 21.07                                  | 0.90 |
| LN-NF     | 6.84       | 133.98      | 65.43                      | 0.00                 | 0.00                                            | 0.00                             | 9.56                                   | 0.97 |

<sup>a</sup> Utilized N from fertilizer (kg/ha) to grain N yield is equal to 48% of the applied n fertilizer according to Ladha et al. [43]; <sup>b</sup> N utilized for 1t grain calculated according to Angus [44], Corr: Correlation coefficient between GY and GNY.

**Table S11.** Pairwise comparison of GYs and its components correlation coefficients among cropping systems.

| P-values | HN-NF        | HN-WF    |
|----------|--------------|----------|
|          | <i>PBWms</i> |          |
| HN-WF    | 0.001***     | 1        |
| LN-NF    | 0.001***     | 0.001*** |

|       |                         |          |
|-------|-------------------------|----------|
|       | <i>HI</i>               |          |
| HN-WF | 0.06                    | 1        |
| LN-NF | 0.01**                  | 0.56     |
|       | <i>TKW</i>              |          |
| HN-WF | 0.001***                | 1        |
| LN-NF | 0.8                     | 0.001*** |
|       | <i>KN<sub>ms</sub></i>  |          |
| HN-WF | 0.01**                  | 1        |
| LN-NF | 0.36                    | 0.01**   |
|       | <i>KNS<sub>ps</sub></i> |          |
| HN-WF | 0.01**                  | 1        |
| LN-NF | 0.45                    | 0.08     |
|       | <i>SN<sub>ms</sub></i>  |          |
| HN-WF | 0.14                    | 1        |
| LN-NF | 0.67                    | 0.06     |

The table displays p-values and significance levels.



**Table S12.** Pairwise comparison of coefficients (intercepts and slopes) of regressions model GY vs traits of interest under three CS.

| Regresssion Equation                     |                       | Rsquare ; Pvalue              | HN-NF        |              | HN-WF        |          |
|------------------------------------------|-----------------------|-------------------------------|--------------|--------------|--------------|----------|
| Chlorophyll content (GY vs SPAD in 2016) |                       |                               |              |              |              |          |
| HN-NF                                    | y = 0.1518x – 0.7986  | R <sup>2</sup> = 0.3042; p*** | intercepts   | Slopes       | intercepts   | Slopes   |
| HN-WF                                    | y = 0.0717x + 5.5511  | R <sup>2</sup> = 0.0369; p*** | 2.03e-05a*** | 0.00341 **   |              |          |
| LN-NF                                    | y = 0.1332x + 0.2681  | R <sup>2</sup> = 0.4196; p*** | 0.25763      | 0.336        | 0.0001 ***   | 0.0154*  |
| Chlorophyll content (GY vs SPAD in 2017) |                       |                               |              |              |              |          |
| HN-NF                                    | y = 0.0375x + 7.4074  | R <sup>2</sup> = 0.0079       | intercepts   | Slopes       | intercepts   | Slopes   |
| HN-WF                                    | y= 0.0319x + 8.6046   | R <sup>2</sup> = 0.0112       | 0.514        | 0.866        |              |          |
| LN-NF                                    | y = 0.0795x + 0.31376 | R <sup>2</sup> = 0.059; p***  | 0.020*       | 0.218        | 0.001 ***    | 0.108    |
| YR (Yellow rust)                         |                       |                               |              |              |              |          |
| HN-NF                                    | y = -0.966x + 10.317  | R <sup>2</sup> = 0.317, p***  | intercepts   | Slopes       | intercepts   | Slopes   |
| HN-WF                                    | y = -0.451x + 11.142  | R <sup>2</sup> = 0.1114, p*** | 0.001***     | 2.93e-05 *** | 2.93e-05 *** |          |
| LN-NF                                    | y = -0.533x + 8.2365  | R <sup>2</sup> = 0.364, pns   | < 2e-16 ***  | 1.20e-05 *** | < 2e-16 ***  | 0.396    |
| HD (Heading Date)                        |                       |                               |              |              |              |          |
| HN-NF                                    | y = 0.257x – 30.389   | R <sup>2</sup> = 0.1293, p*** | intercepts   | Slopes       | intercepts   | Slopes   |
| HN-WF                                    | y = 0.150x – 12.247   | R <sup>2</sup> = 0.0669, p*   | 0.035 *      | 0.058        |              |          |
| LN-NF                                    | y = 0.260x – 32.151   | R <sup>2</sup> = 0.229, p***  | 0.826        | 0.959        | 0.008 **     | 0.027 *  |
| PH (plant height)                        |                       |                               |              |              |              |          |
| HN-NF                                    | y = -0.059x + 13.826  | R <sup>2</sup> = 0.113, p***  | intercepts   | Slopes       | intercepts   | Slopes   |
| HN-WF                                    | y = -0.067x + 16.489  | R <sup>2</sup> = 0.376, p***  | 0.012 *      | 0.495        |              |          |
| LN-NF                                    | y = -0.043x + 10.918  | R <sup>2</sup> = 0.222, p***  | 0.003**      | 0.129        | 8.39e-13 *** | 0.003 ** |
| GPC (grain protein content)              |                       |                               |              |              |              |          |
| HN-NF                                    | y = -1.085x + 23.33   | R <sup>2</sup> = 0.127***     | intercepts   | Slopes       | intercepts   | Slopes   |
| HN-WF                                    | y = -1.253x + 27.91   | R <sup>2</sup> = 0.631***     | 0.419        | 0.615        |              |          |
| LN-NF                                    | y = -1.550x + 24.16   | R <sup>2</sup> = 0.491***     | 0.626        | 0.545        | 0.723        | 0.846    |
| GSC (grain starch content)               |                       |                               |              |              |              |          |
| HN-NF                                    | y = 0.857x – 54.91    | R <sup>2</sup> = 0.1775***    | intercepts   | Slopes       | intercepts   | Slopes   |
| HN-WF                                    | y = 0.7953x – 47.6    | R <sup>2</sup> = 0.481***     | 0.052        | 0.326        |              |          |
| LN-NF                                    | y = 0.776x – 50.12    | R <sup>2</sup> = 0.295***     | 0.733        | 0.017 *      | 0.012*       | 0.015*   |

<sup>a</sup> Pvalue of the comparison between both intercepts and slopes, \* Significant at the 0.05 probability level,

\*\* Significant at the 0.01 probability level, \*\*\* Significant at the 0.001 probability level, ns, nonsignificant at the 0.05 probability level

**Table S13.** Full regression (A) and path models (B) with direct and indirect effects of 13 independent variables on GY of 220 cultivars tested in 3 different CS over three growing seasons.**A**

| Full regression model |                |             |                     |        |             |                     |        |             |                     |
|-----------------------|----------------|-------------|---------------------|--------|-------------|---------------------|--------|-------------|---------------------|
| Variable              | HN-NF          |             |                     | HN-WF  |             |                     | LN-NF  |             |                     |
|                       | b <sup>α</sup> | ± std Error | Prob <sup>sig</sup> | b      | ± std Error | Prob <sup>sig</sup> | b      | ± std Error | Prob <sup>sig</sup> |
| Constant              | −232.20        | 69.76       | 0.001 **            | −95.24 | 56.63       | 0.094               | −209.5 | 51.92       | 0 ***               |
| HD                    | 0.82           | 0.24        | 0.001 ***           | 0.81   | 0.22        | 0 ***               | 0.7    | 0.19        | 0 ***               |
| SPAD                  | 0.28           | 0.14        | 0.04 *              | 0.04   | 0.13        | 0.738               | 0.36   | 0.1         | 0 ***               |
| YR                    | −2.71          | 0.58        | 0 ***               | −1.66  | 0.42        | 0 ***               | −2.08  | 0.28        | 0 ***               |
| PH                    | −0.06          | 0.06        | 0.382               | −0.07  | 0.05        | 0.176               | 0.04   | 0.04        | 0.332               |
| SNms                  | 0.00           | 0.01        | 0.837               | −0.01  | 0.01        | 0.134               | 0.03   | 0.01        | 0.032 *             |
| KNSp                  | −0.21          | 0.14        | 0.128               | −0.12  | 0.09        | 0.201               | 0.11   | 0.12        | 0.347               |
| KNms                  | 0.00           | 0.00        | 0.206               | 0      | 0           | 0.747               | 0      | 0           | 0.312               |
| TKW                   | 0.16           | 0.15        | 0.294               | 0.24   | 0.11        | 0.034 *             | 0.13   | 0.11        | 0.206               |
| HI                    | 161.30         | 14.70       | 0 ***               | 86.37  | 13.16       | 0 ***               | 94.32  | 13.49       | 0 ***               |
| PBWms                 | 0.03           | 0.00        | 0 ***               | 0.01   | 0           | 0.026 *             | 0.01   | 0           | 0.001 ***           |
| GPC                   | −1.06          | 1.20        | 0.379               | −5.75  | 0.88        | 0 ***               | −3.69  | 0.93        | 0 ***               |
| GSC                   | 1.26           | 0.63        | 0.047 *             | 1.51   | 0.53        | 0.004 **            | 1.69   | 0.51        | 0.001 **            |
| Sedimentation         | −0.13          | 0.08        | 0.137               | −0.13  | 0.06        | 0.03 *              | 0      | 0.1         | 0.986               |
| R square (%)          | 86.2           |             |                     | 81.6   |             |                     | 84.7   |             |                     |

α regression slope; \* Significant of the slope at the 0.05 probability level; \*\* Significant of the slope at the 0.01 probability level; \*\*\* Significant of the slope at the 0.001 probability level; ns, nonsignificant of the slope at the 0.05 probability level

**B**

| Path Analysis model |               |                 |        |                     |               |                 |        |                     |               |                 |        |                     |
|---------------------|---------------|-----------------|--------|---------------------|---------------|-----------------|--------|---------------------|---------------|-----------------|--------|---------------------|
| Variable            | HN-NF         |                 |        |                     | HN-WF         |                 |        |                     | LN-NF         |                 |        |                     |
|                     | Direct effect | Indirect effect | ri/j   | Prob <sup>sig</sup> | Direct effect | Indirect effect | ri/j   | Prob <sup>sig</sup> | Direct effect | Indirect effect | ri/j   | Prob <sup>sig</sup> |
| HD                  | 0.11          | 0.175           | 0.285  | 0***                | 0.127         | −0.014          | 0.113  | 0***                | 0.132         | 0.330           | 0.462  | 0***                |
| SPAD                | 0.064         | 0.426           | 0.490  | 0.032*              | 0.012         | 0.198           | 0.210  | 0.729               | 0.13          | 0.433           | 0.563  | 0***                |
| YR                  | −0.158        | −0.405          | −0.563 | 0***                | −0.128        | −0.179          | −0.307 | 0***                | −0.243        | −0.359          | −0.602 | 0***                |
| PH                  | −0.031        | −0.304          | −0.335 | 0.365               | −0.067        | −0.541          | −0.608 | 0.16                | 0.042         | −0.522          | −0.480 | 0.314               |
| SNms                | 0.009         | 0.153           | 0.162  | 0.831               | −0.079        | 0.102           | 0.023  | 0.12                | 0.131         | 0.065           | 0.196  | 0.026*              |
| KNSp                | −0.115        | 0.556           | 0.441  | 0.114               | −0.101        | 0.334           | 0.233  | 0.185               | 0.077         | 0.307           | 0.384  | 0.33                |
| KNms                | −0.112        | 0.666           | 0.554  | 0.19                | 0.029         | 0.329           | 0.358  | 0.738               | −0.093        | 0.649           | 0.556  | 0.295               |
| TKW                 | 0.047         | 0.375           | 0.422  | 0.277               | 0.092         | 0.006           | 0.098  | 0.027               | 0.056         | 0.345           | 0.401  | 0.19                |
| HI                  | 0.51          | 0.275           | 0.785  | 0***                | 0.354         | 0.346           | 0.700  | 0***                | 0.389         | 0.278           | 0.667  | 0***                |
| PBWms               | 0.447         | 0.298           | 0.745  | 0***                | 0.118         | 0.090           | 0.208  | 0.02*               | 0.214         | 0.314           | 0.528  | 0***                |
| GPC                 | −0.035        | −0.321          | −0.356 | 0.362               | −0.38         | −0.414          | −0.794 | 0***                | −0.172        | −0.532          | −0.704 | 0***                |
| GSC                 | 0.062         | 0.359           | 0.421  | 0.039*              | 0.137         | 0.546           | 0.683  | 0.003**             | 0.122         | 0.426           | 0.548  | 0.001**             |
| Sedimentation       | −0.056        | −0.287          | −0.343 | 0.123               | −0.098        | −0.480          | −0.578 | 0.024*              | 0.001         | −0.430          | −0.429 | 0.985               |
| R square            | 86.2          |                 |        |                     | 81.6          |                 |        |                     | 84.7          |                 |        |                     |

\* Significant of the slope at the 0.05 probability level; \*\* Significant of the slope at the 0.01 probability level; \*\*\* Significant of the slope at the 0.001 probability level; ns, nonsignificant of the slope at the 0.05 probability level

**Table S14.** Summary of winning genotypes in the three environments and their year of release.

| Genotypes<br>(Name) | Briwecs<br>Number | Release<br>Year | Selected_HN-NF | Selected_HN-WF | Selected_LN-NF | all 3 CS | Score<br>Summary |
|---------------------|-------------------|-----------------|----------------|----------------|----------------|----------|------------------|
| Memory              | 6                 | 2013            | 1              | 0              | 0              | 0        | 1                |
| KWS Santiago        | 13                | 2011            | 0              | 1              | 0              | 0        | 1                |
| Mulan               | 23                | 2006            | 0              | 0              | 1              | 0        | 1                |
| Patras              | 26                | 2012            | 1              | 0              | 0              | 0        | 1                |
| Biscay              | 31                | 2000            | 0              | 1              | 0              | 0        | 1                |
| Colonia             | 45                | 2011            | 1              | 0              | 0              | 0        | 1                |
| Gaicho              | 48                | 1993            | 0              | 0              | 1              | 0        | 1                |
| Tobak               | 54                | 2011            | 0              | 1              | 0              | 0        | 1                |
| Fedor               | 68                | 2007            | 1              | 0              | 0              | 0        | 1                |
| Bombus              | 106               | 2012            | 0              | 1              | 0              | 0        | 1                |
| Alves               | 132               | 2010            | 0              | 0              | 1              | 0        | 1                |
| Rumor               | 204               | 2013            | 0              | 1              | 0              | 0        | 1                |
| Hybery              | 216               | 2010            | 0              | 1              | 0              | 0        | 1                |
| Hystar              | 217               | 2007            | 0              | 1              | 0              | 0        | 1                |
| Hylux               | 218               | 2012            | 0              | 0              | 0              | 1        | 1                |
| Claire              | 4                 | 1999            | 0              | 0              | 1              | 1        | 2                |
| Mentor              | 11                | 2012            | 1              | 1              | 0              | 0        | 2                |
| KWS Pius            | 17                | 2010            | 1              | 0              | 0              | 1        | 2                |
| Capone              | 32                | 2012            | 1              | 0              | 1              | 0        | 2                |
| Edward              | 36                | 2013            | 0              | 1              | 0              | 1        | 2                |
| Atomic              | 53                | 2012            | 1              | 0              | 0              | 1        | 2                |
| Elixer              | 67                | 2012            | 1              | 1              | 0              | 0        | 2                |
| Edgar               | 83                | 2010            | 1              | 0              | 0              | 1        | 2                |
| KWS Cobalt          | 95                | 2013            | 1              | 0              | 0              | 1        | 2                |
| Rebell              | 5                 | 2013            | 1              | 0              | 1              | 1        | 3                |
| Zappa               | 8                 | 2009            | 1              | 0              | 1              | 1        | 3                |
| Anapolis            | 29                | 2013            | 1              | 1              | 0              | 1        | 3                |
| Tabasco             | 33                | 2008            | 1              | 1              | 0              | 1        | 3                |
| Linus               | 42                | 2010            | 1              | 1              | 0              | 1        | 3                |
| Intro               | 61                | 2011            | 1              | 0              | 1              | 1        | 3                |
| SY Ferry            | 85                | 2012            | 1              | 0              | 1              | 1        | 3                |
| Hyland              | 215               | 2009            | 1              | 1              | 1              | 0        | 3                |

The digits 0, 1, 2, 3 indicate the number of selection times of a high yielding genotype under the defined CS

**Table S15.** Pairwise comparison of coefficients (intercepts and slopes) of regressions model traits of interest vs years of release under three CS.

| Traits        | Treatment | HN-NF             |               | HN-WF             |               |
|---------------|-----------|-------------------|---------------|-------------------|---------------|
|               |           | <i>intercepts</i> | <i>Slopes</i> | <i>intercepts</i> | <i>Slopes</i> |
| HD            | HN-WF     | 0.352             | 0.359         |                   |               |
|               | LN-NF     | 0.482             | 0.523         | 0.0865            | 0.103         |
| SPAD          | HN-WF     | 0.32005           | 0.34407       |                   |               |
|               | LN-NF     | 0.00763 **        | 0.01061 *     | 0.000188 ***      | 0.000354 ***  |
| YR            | HN-WF     | 0.38921           | 0.4043        |                   |               |
|               | LN-NF     | 0.00173 **        | 0.00218 **    | 9.33e-05 ***      | 0.000136 ***  |
| PH            | HN-WF     | 0.43362           | 0.43585       |                   |               |
|               | LN-NF     | 0.00488 **        | 0.00573 **    | 0.0532            | 0.0591        |
| SNms          | HN-WF     | 0.402             | 0.406         |                   |               |
|               | LN-NF     | 0.627             | 0.517         | 0.727             | 0.8558        |
| KNSp          | HN-WF     | 0.0694            | 0.0755        |                   |               |
|               | LN-NF     | 0.7736            | 0.7488        | 0.12285           | 0.14113       |
| KNms          | HN-WF     | 0.0574            | 0.0640        |                   |               |
|               | LN-NF     | 0.0609            | 0.0475 *      | 0.978             | 0.889         |
| TKW           | HN-WF     | 0.1817            | 0.21242       |                   |               |
|               | LN-NF     | 0.78471           | 0.69281       | 0.0926            | 0.0861        |
| HI            | HN-WF     | 0.0568            | 0.0701        |                   |               |
|               | LN-NF     | 0.3039            | 0.2786        | 0.356             | 0.443         |
| PBWms         | HN-WF     | 4.99e-05 ***      | 6.97e-05 ***  |                   |               |
|               | LN-NF     | 0.00795 **        | 0.00584 **    | 0.1164            | 0.1715        |
| GY            | HN-WF     | 0.000247 ***      | 0.000486 ***  |                   |               |
|               | LN-NF     | 0.000609 ***      | 0.000340 ***  | 0.761             | 0.904         |
| GPC           | HN-WF     | 0.00181 **        | 0.00215 **    |                   |               |
|               | LN-NF     | 0.32759           | 0.1585        | 0.0384 *          | 0.108         |
| GSC           | HN-WF     | 0.0587            | 0.0759        |                   |               |
|               | LN-NF     | 0.7434            | 0.8002        | 0.126             | 0.137         |
| Sedimentation | HN-WF     | 0.5219            | 0.4838        |                   |               |
|               | LN-NF     | 0.0072 **         | 0.0103 *      | 0.0332 *          | 0.0522        |

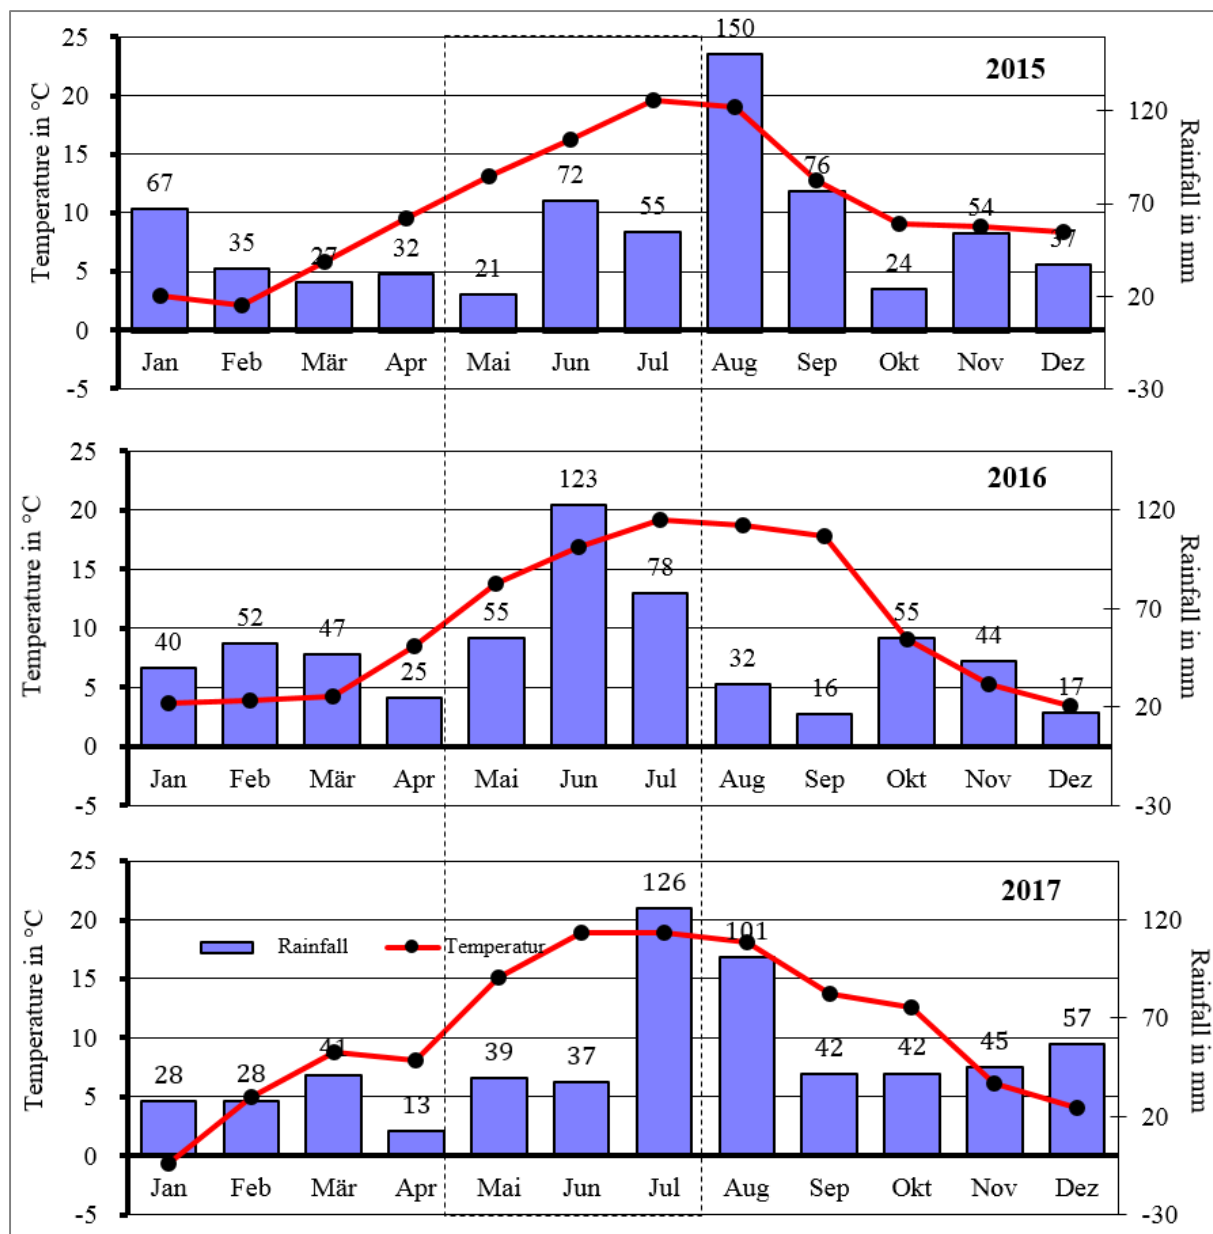

**Figure S1.** Weather conditions data from the experimental site illustrating significant differences in rainfall (pink bars) and temperature (red curves) among growing seasons 2015, 2016, and 2017 at reproductive stage (dotted rectangle).

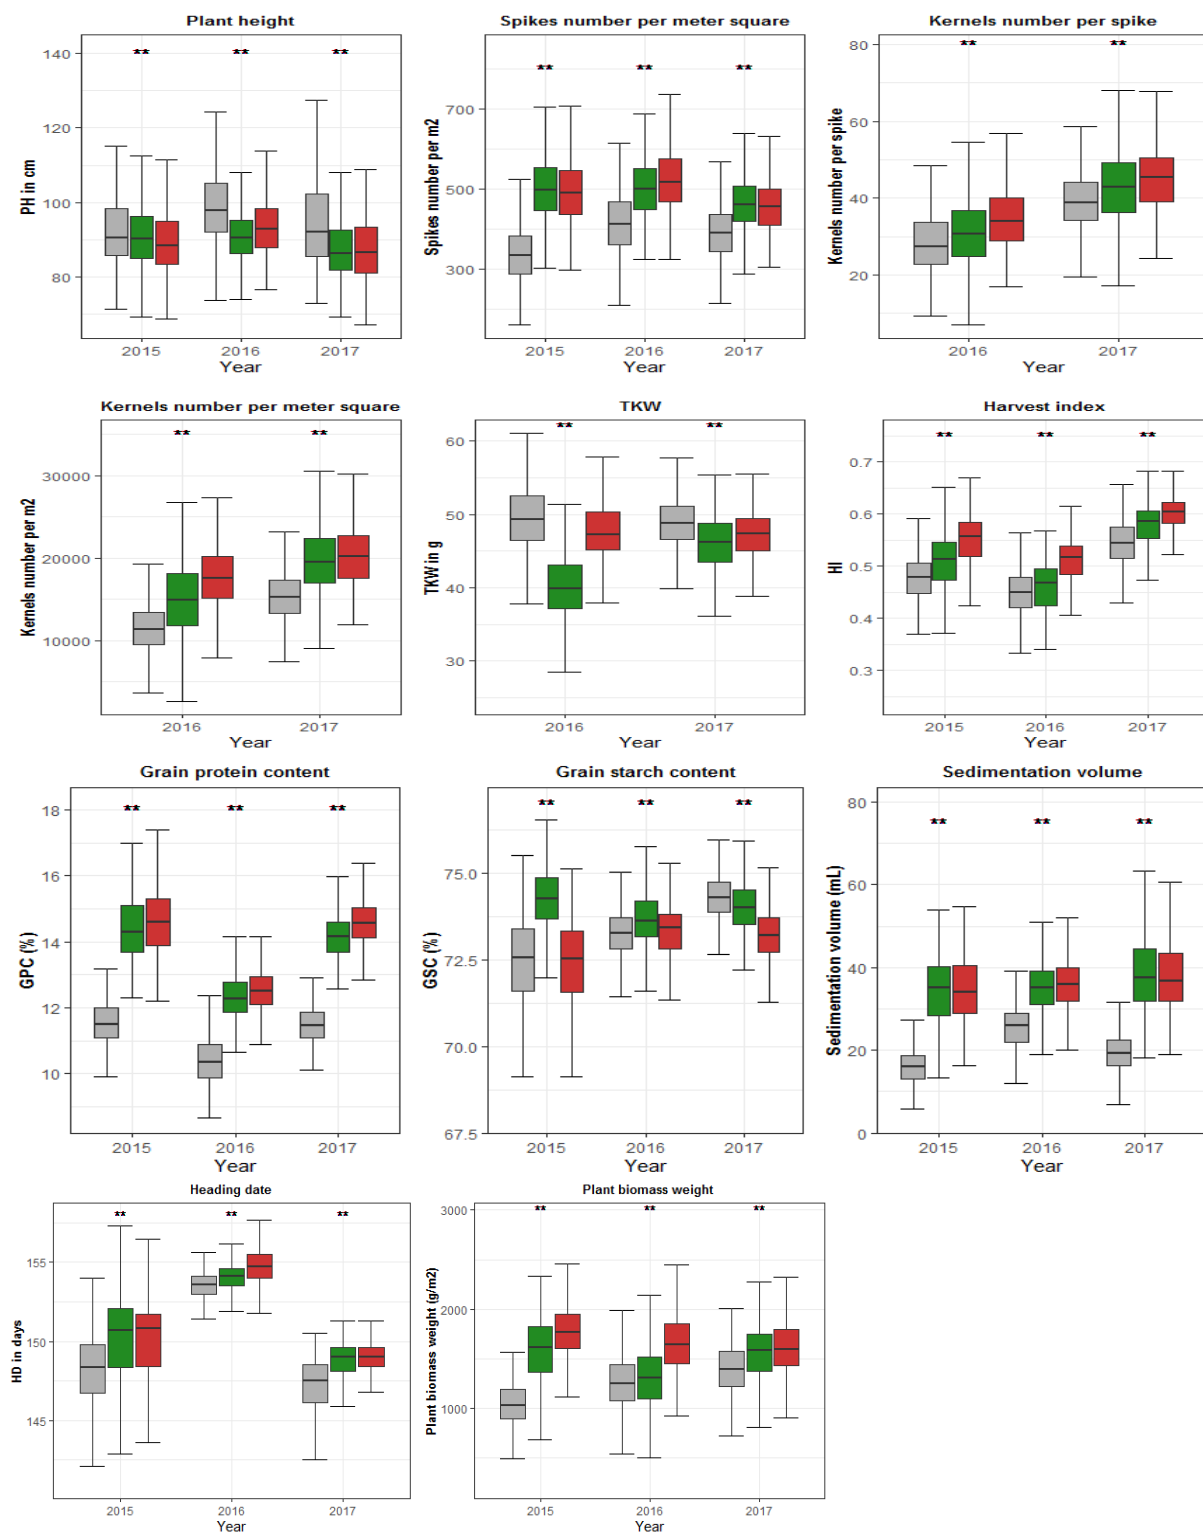

**Figure S2.** Significant differences among the three cropping systems (CS) for evaluated traits with LN-NF in gray, HN-NF in green, and HN-WF in red color. NS means not significant at  $p=0.05$ , \*\* significant at  $p=0.01$ , and \*\*\* significant at  $p=0.001$ .

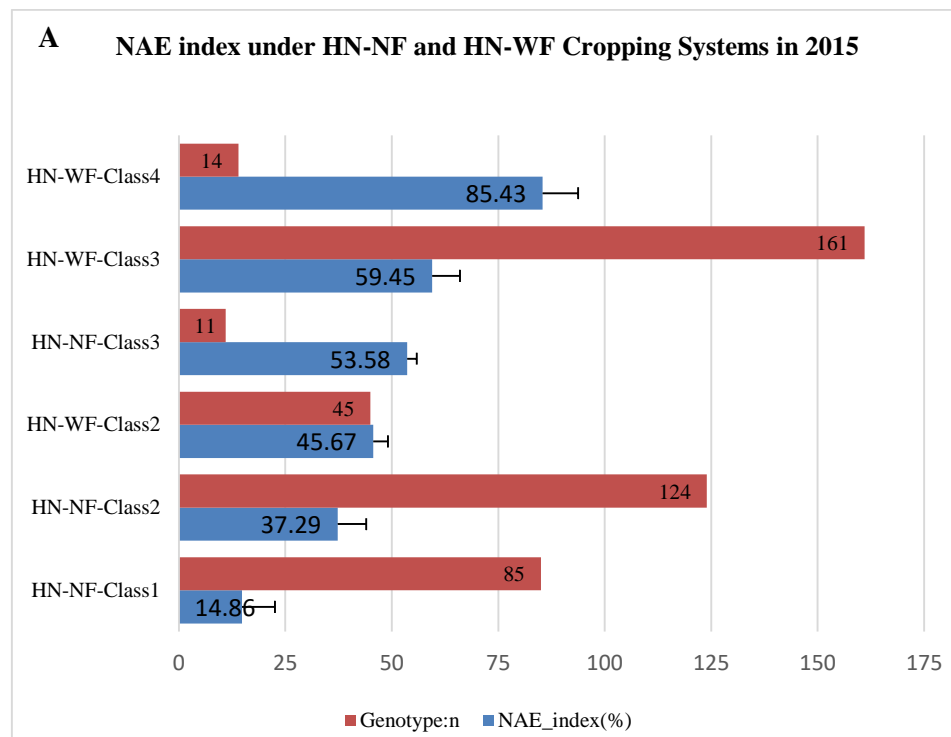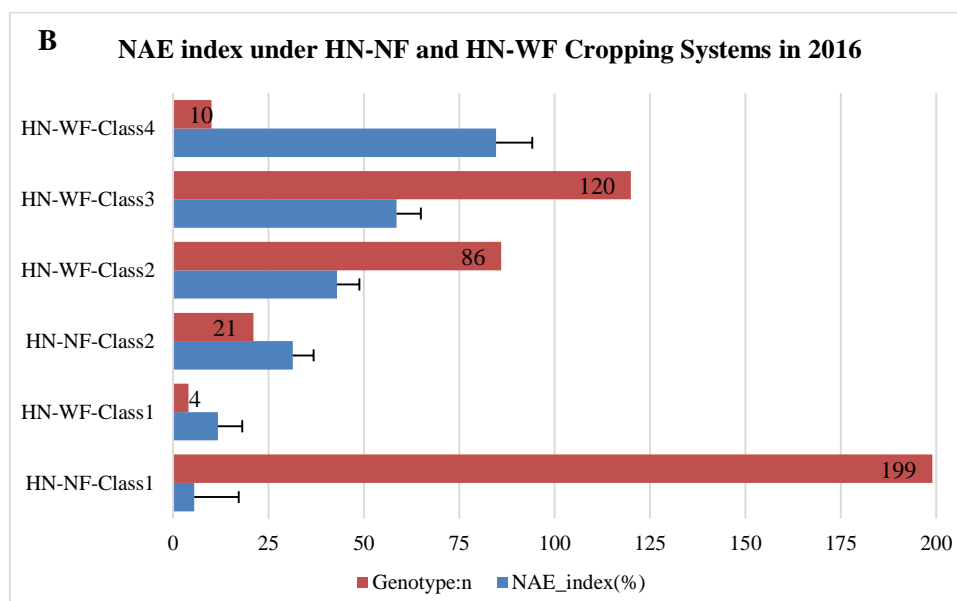

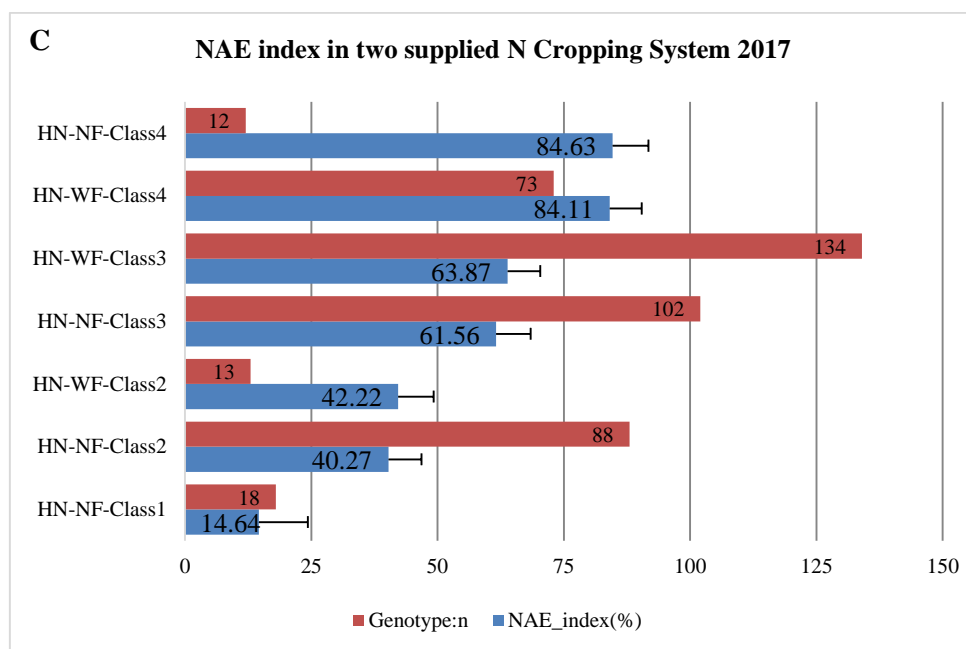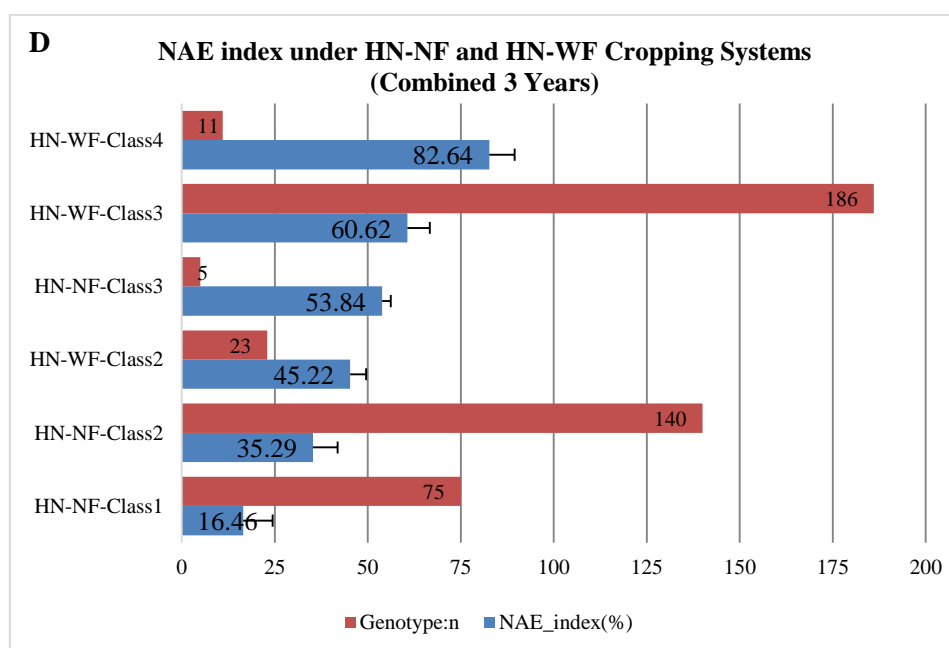

**Figure S3.** Agronomy efficiency use of Nitrogen supplied. The red bar charts are the number of cultivars belonging to the defined class of NAE index. The blue bar charts are showing the average percentage of NAE.



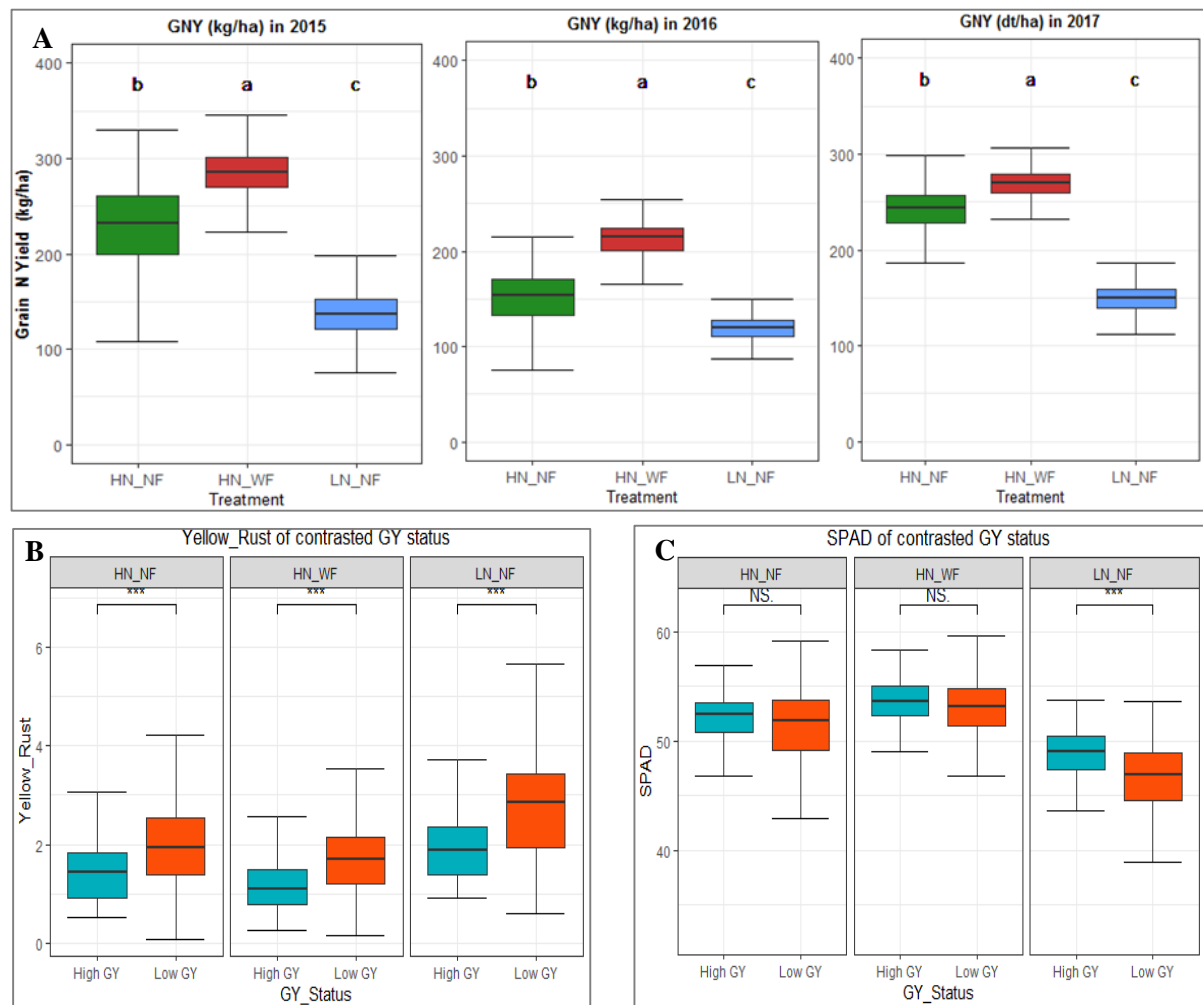

**Figure S4.** (A) Grain N yield (GNV) under three CS (HN–NF in green color, HN–WF in red color, LN–NF in blue color) across the three years (abc) above the boxplots denotes the groups means with a the highest and c the lowest means GNV; (B) Resilience to YR infestation of GY contrasting cultivars; (C) Chlorophyll content (SPAD) of GY contrasting cultivars. NS means not significant at  $p=0.05$  and \*\*\* significant at  $p=0.001$ .

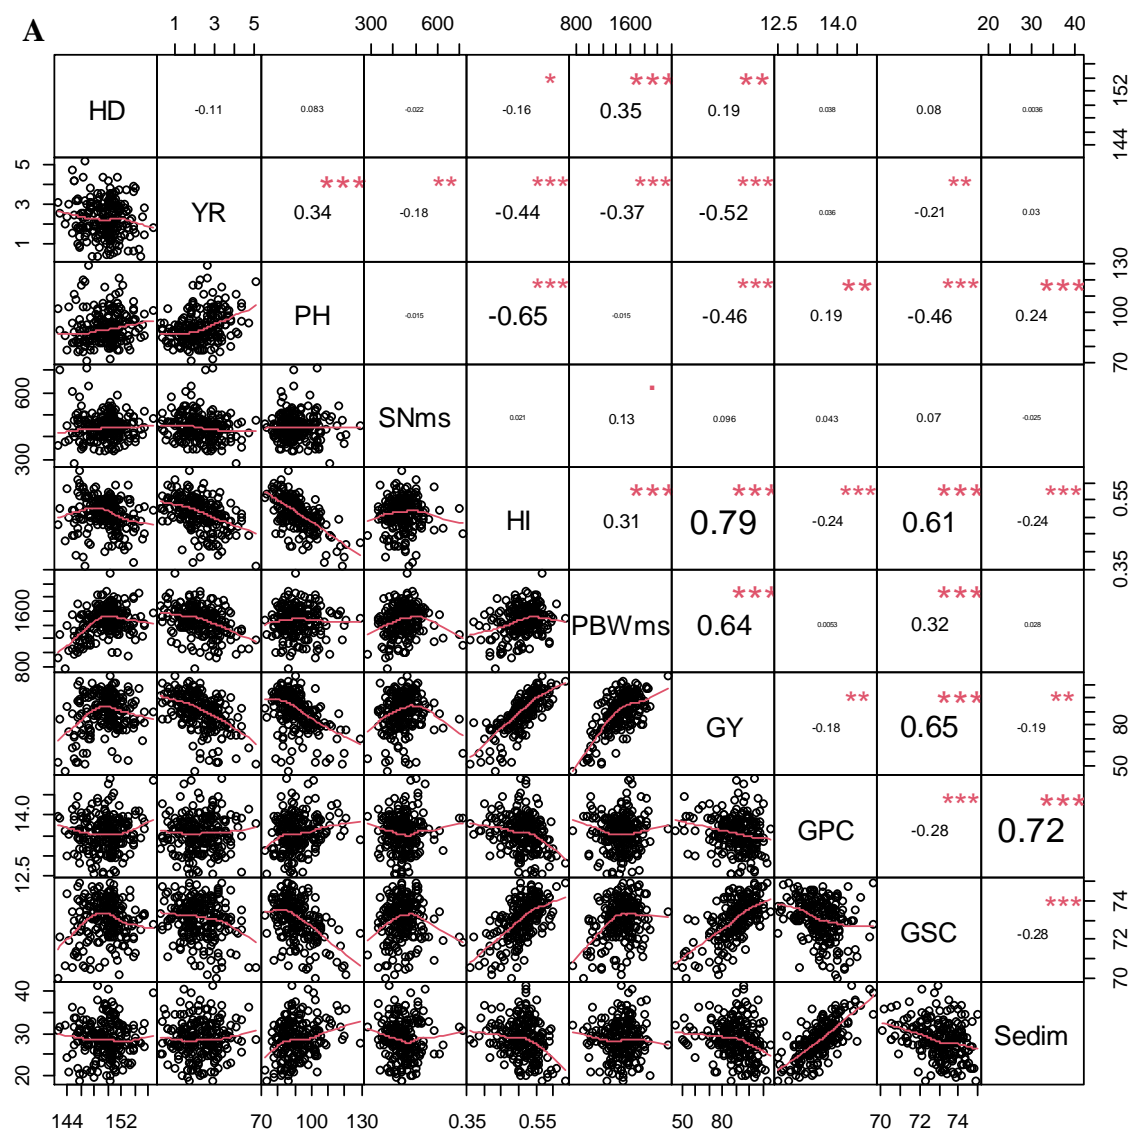

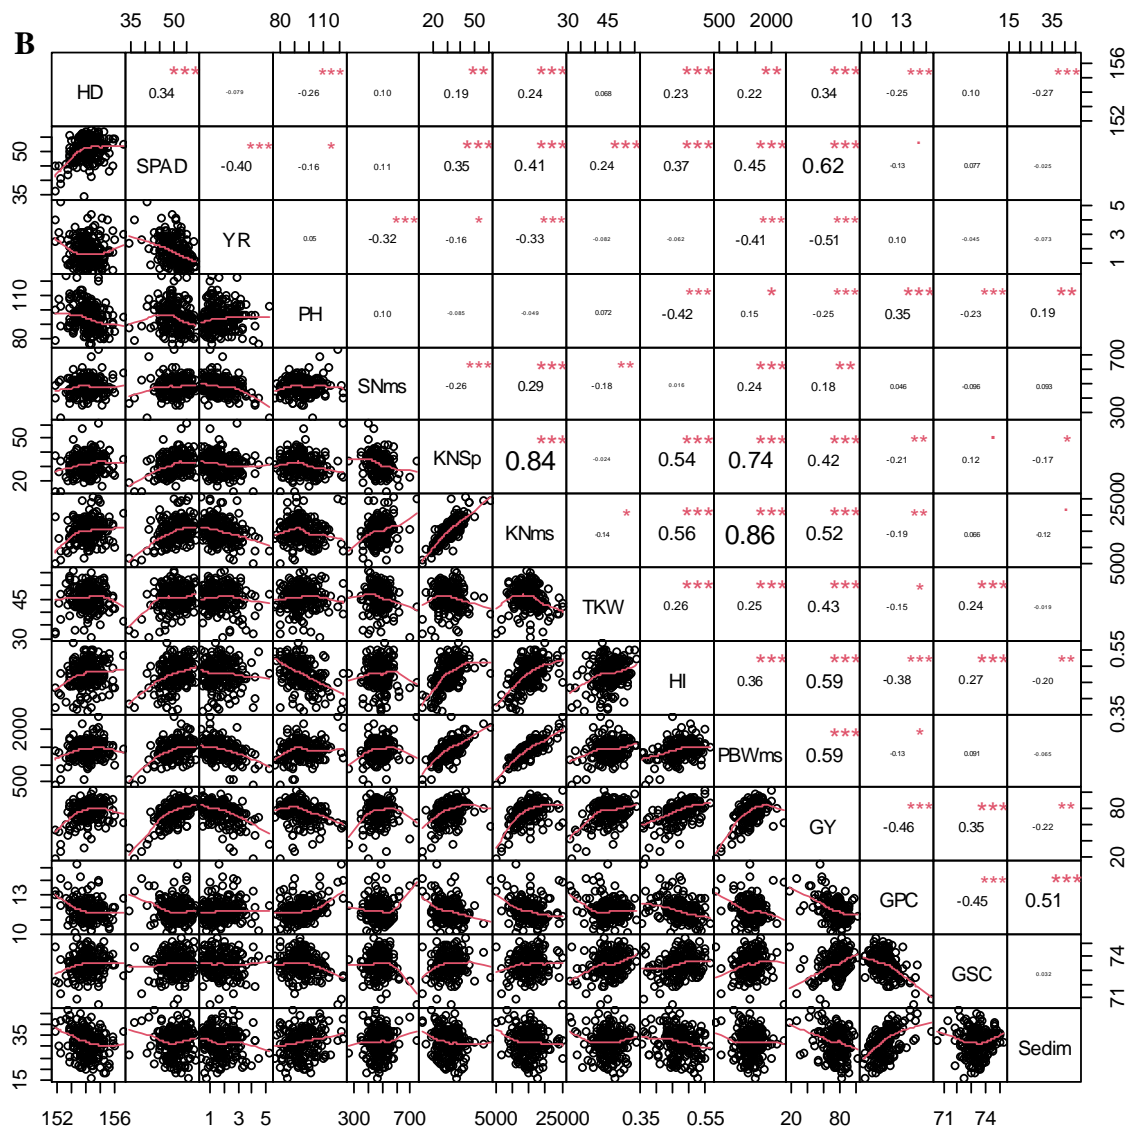

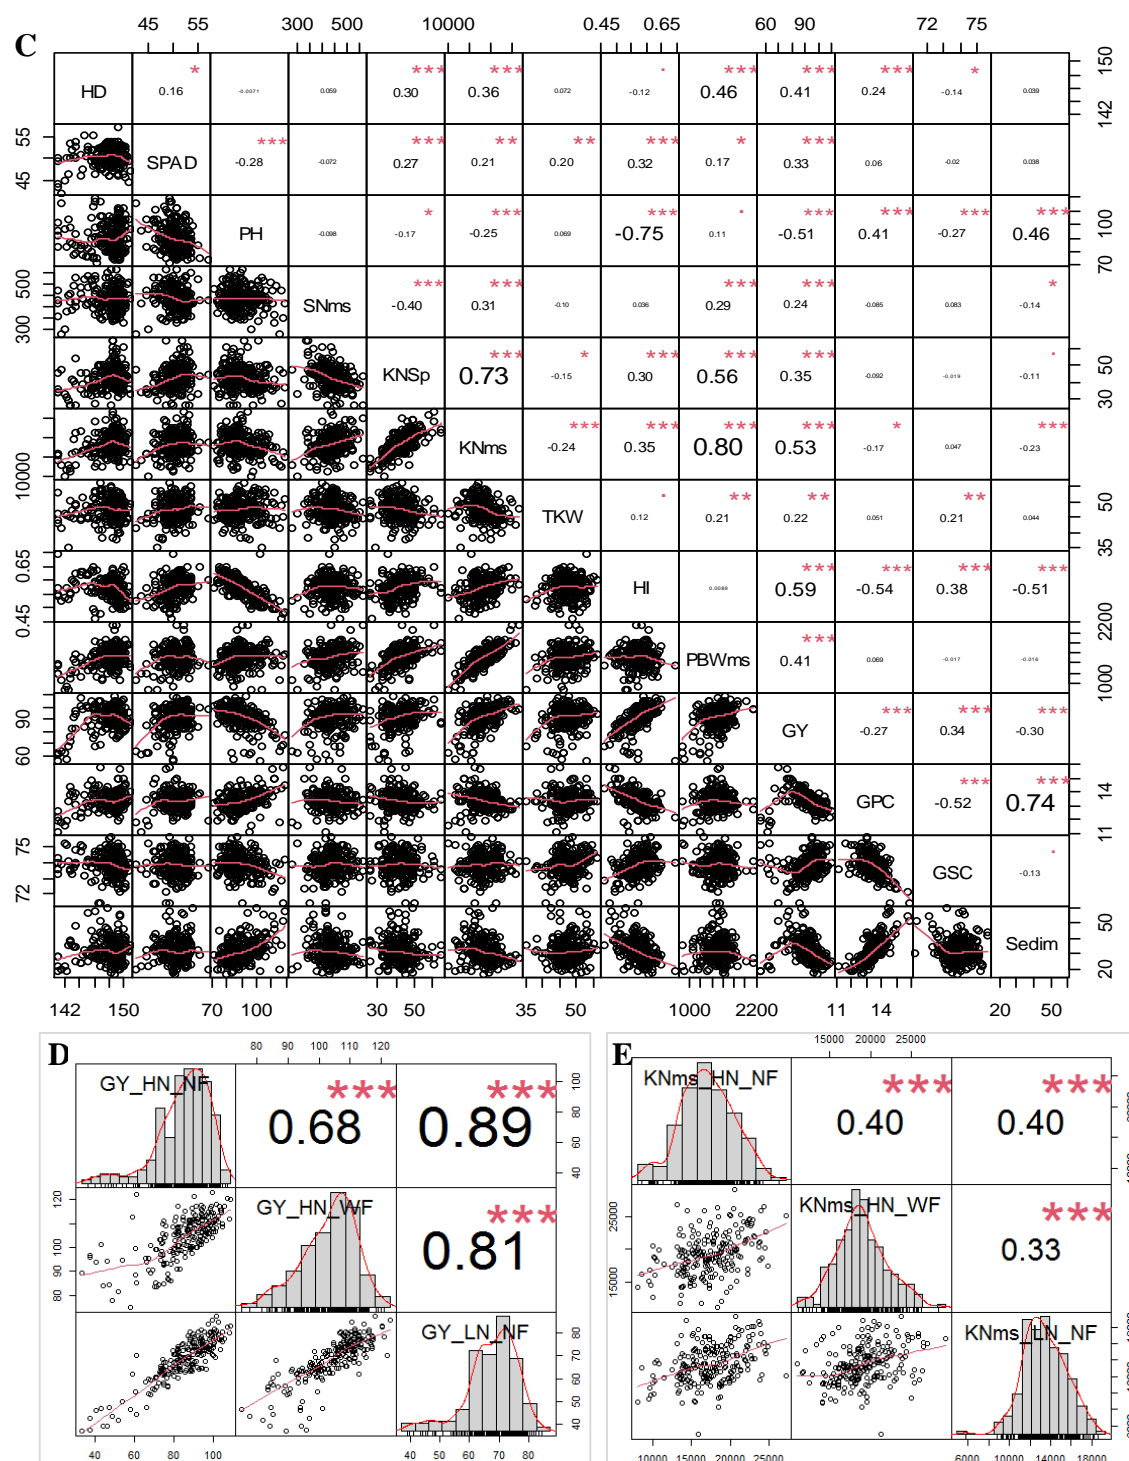

**Figure S5.** Pearson correlation coefficients and associated probability among evaluated traits based on of the genotype mean from the three tested cropping systems in three years of trials (A)=2015; (B)=2016; (C)=2017. (DE) Correlation among the three CS for GY and KNms. All traits were measured in a wheat population containing 220 breeding lines grown in three cropping systems between 2015 and 2017. The number of stars indicates the significance level, \* $P < 0.05$ ; \*\* $P < 0.01$  and \*\*\*  $P < 0.001$ .

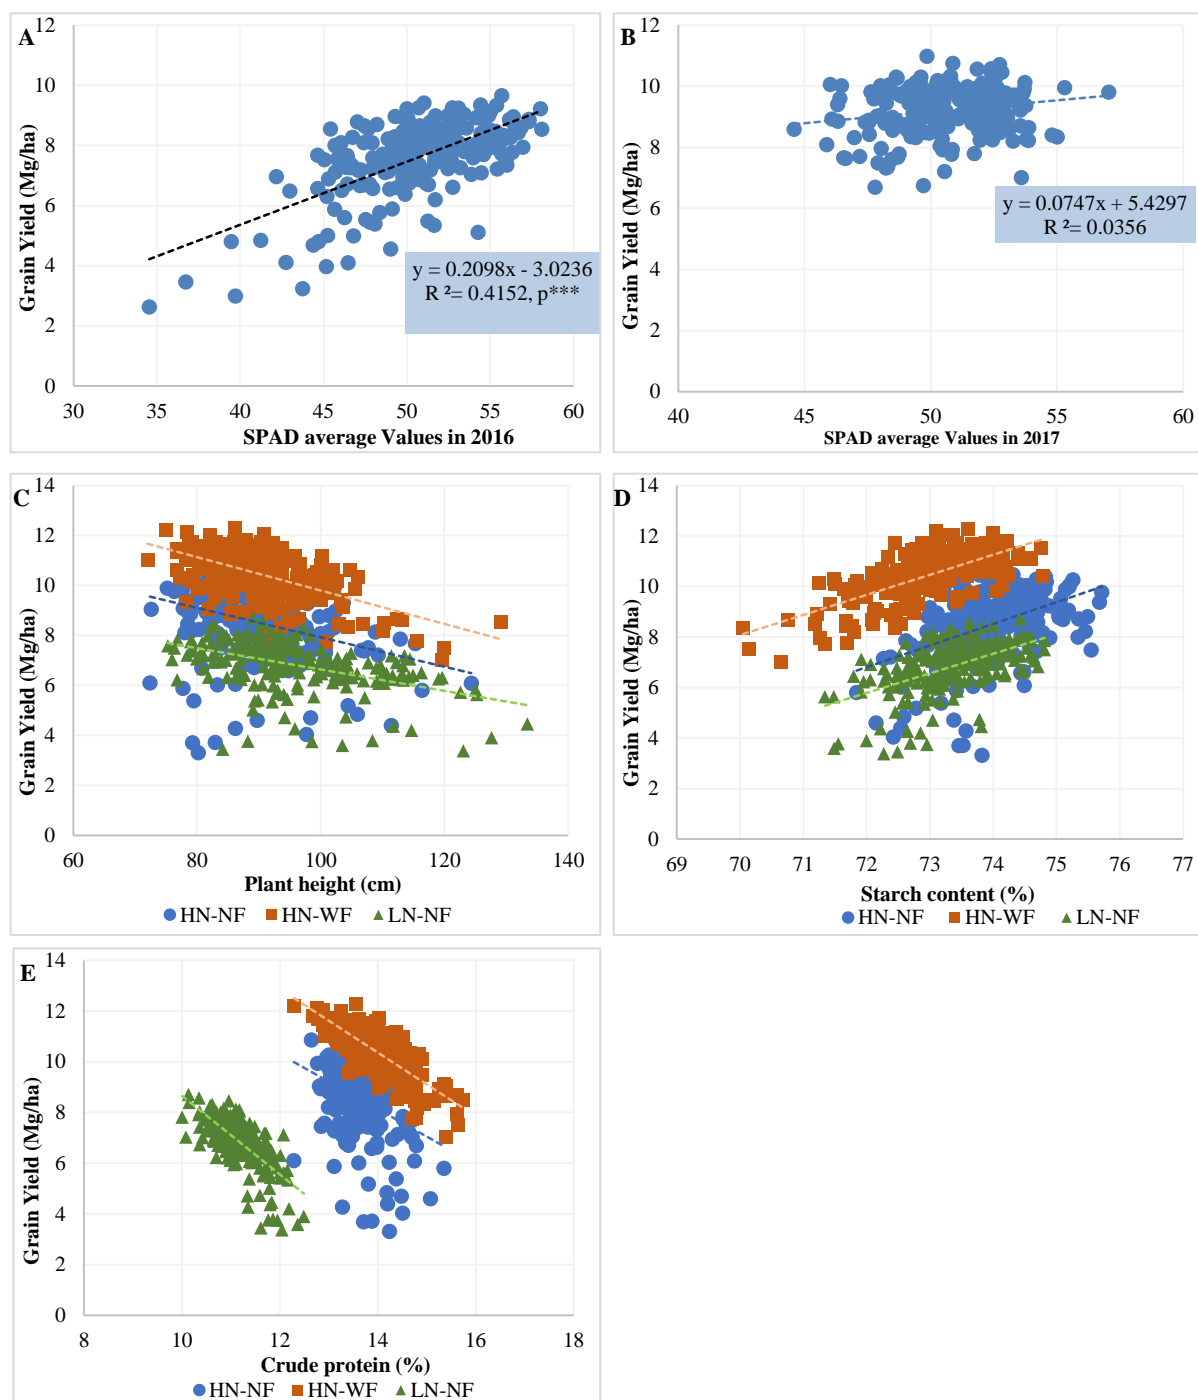

**Figure S6.** Relationship between GY and traits of interest. **(A)** average SPAD in 2016; **(B)** average SPAD in 2017; **(C)** plant height (cm); **(D)** grain starch content (%); **(E)** grain crude protein content (%) under each CS. The regressions equations, the significance of the slopes and comparison among slopes of the three CS is given Table S14.

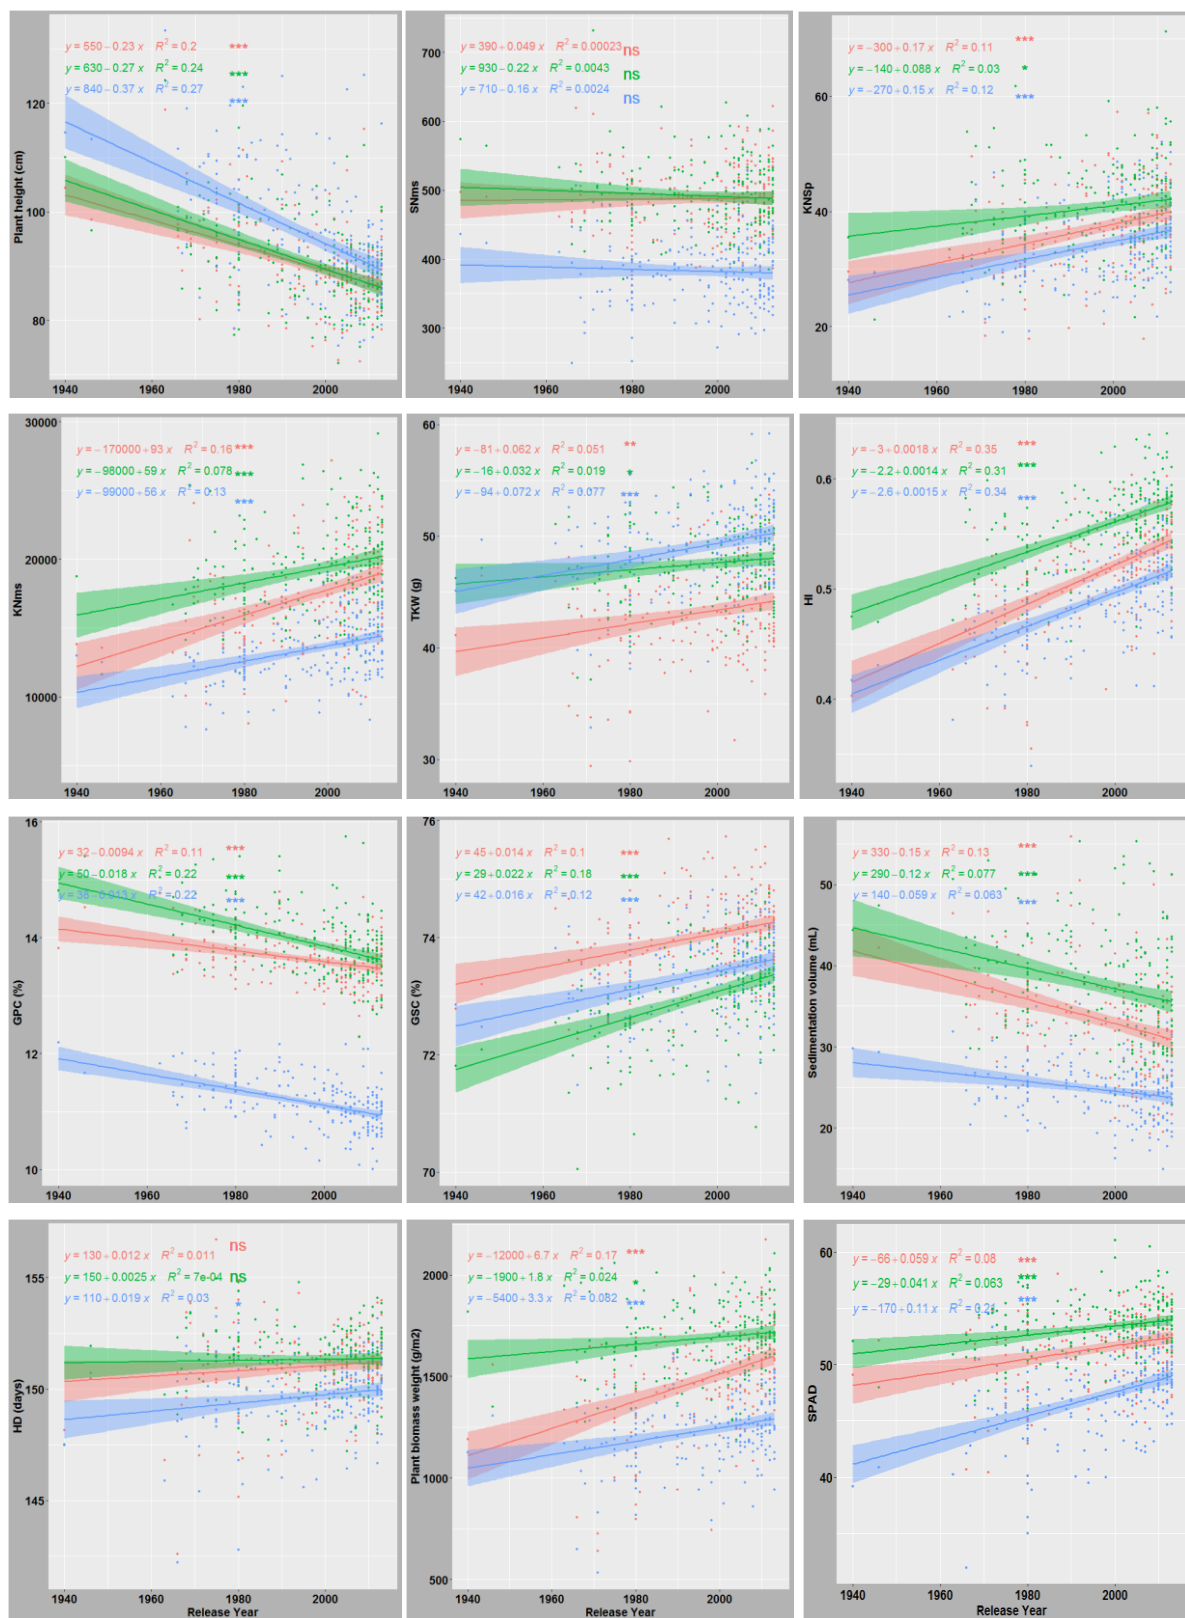

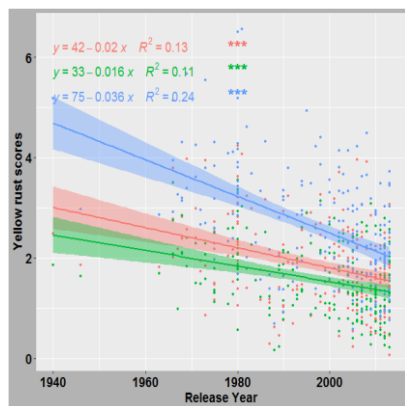

**Figure S7.** Temporal trends observed in evaluated traits in relation to year of registration among 209 cultivars under three CS, HN-WF in green, HN-NF in red and LN- NF in blue color. The center lines represent the regression lines and the shaded regions represent the 95% confidence intervals. The signs ns stands for the slope is not significant at 0.05; \* is significant at 0.05; \*\* is significant at 0.01, \*\*\* is significant at 0.001.

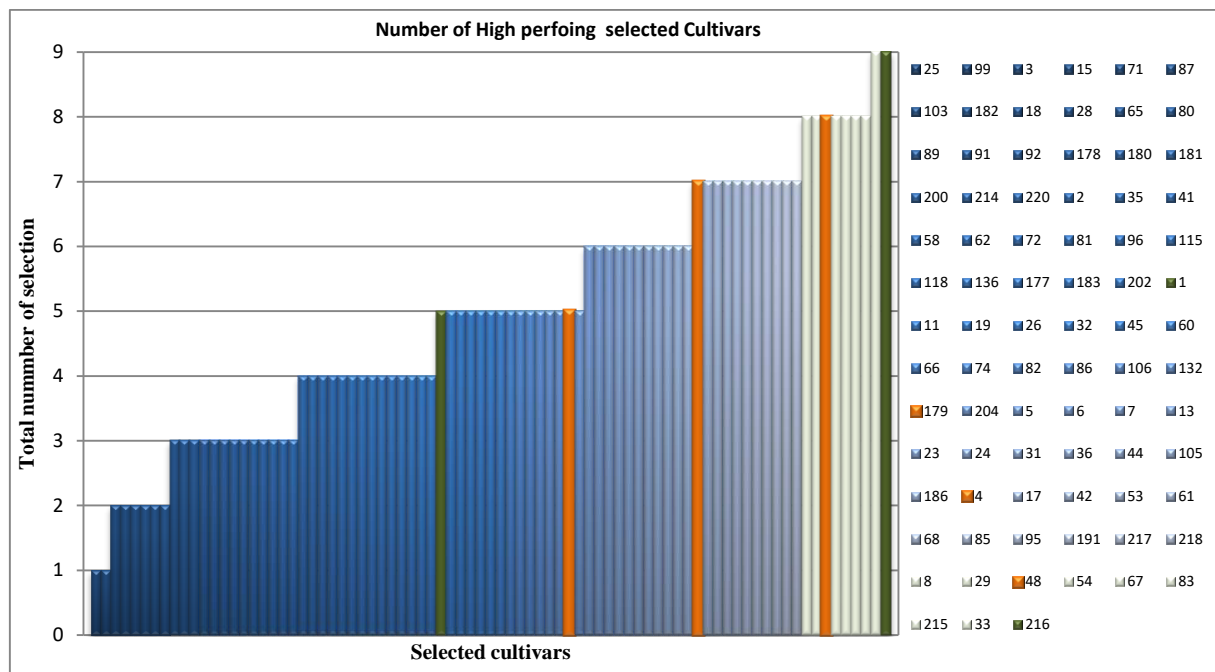

**Figure S8.** Graphical representation of selected cultivars based on performance index. The 46 cultivars comprised between 1 and 216 (colored in green) were used in the stability analysis. Among 46 high performing cultivars, only three cultivars colored in orange (Apache=179, Claire=4, and Gaucho=48) were older released cultivars (released before 2000).



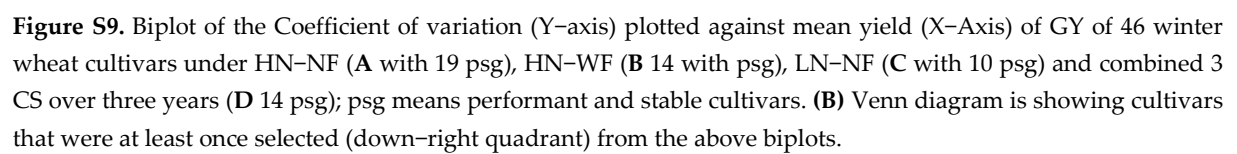

Supplement: s1 [file s1]
